# Supplementary figures and images for: Planning horizon affects prophylactic decision-making and epidemic dynamics
Source: PeerJ journal article supplement (doi:10.7717/peerj.2678), 2016-11-08

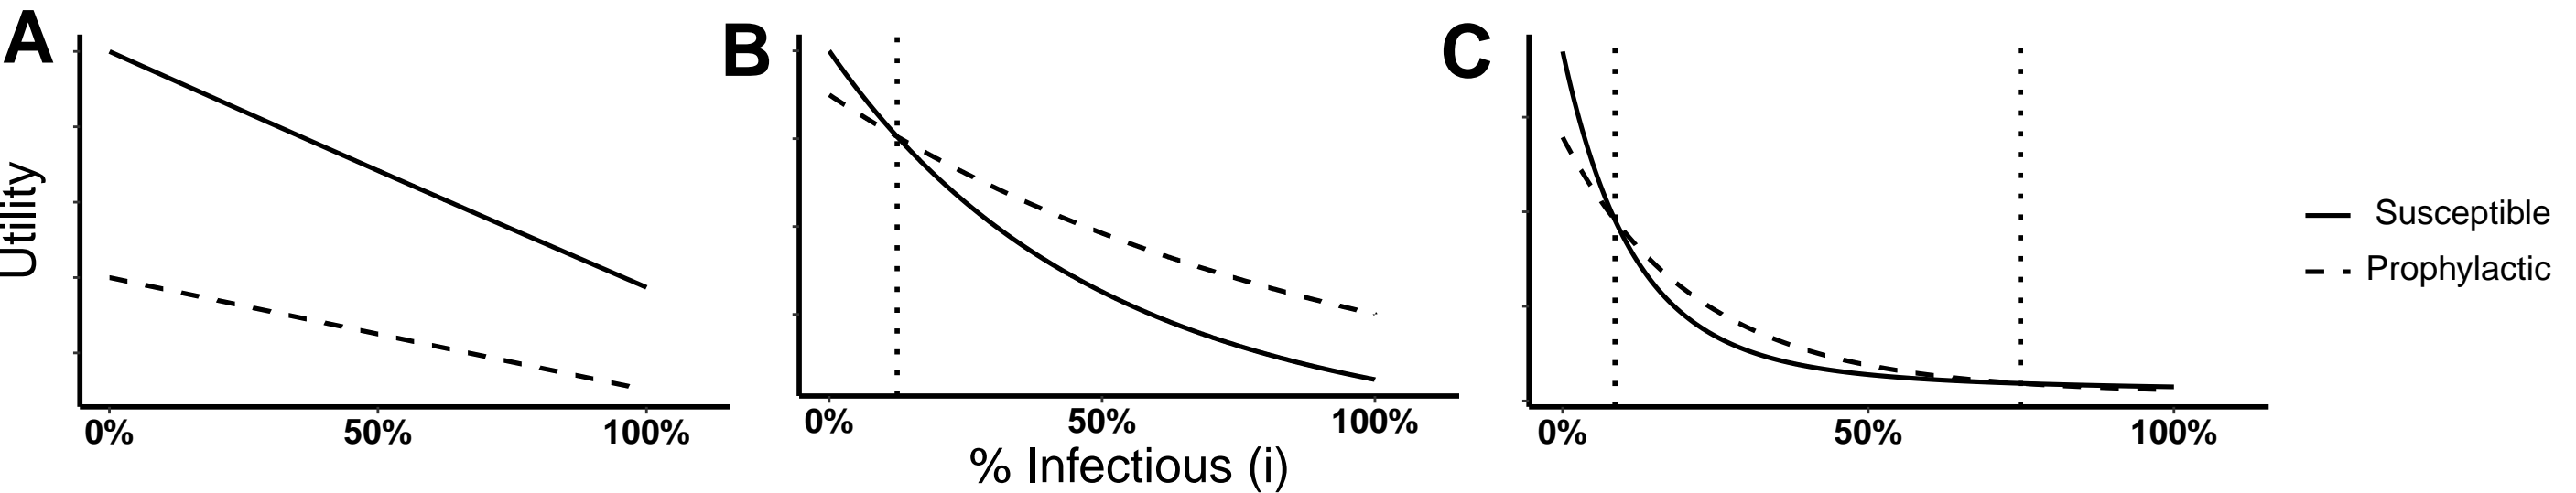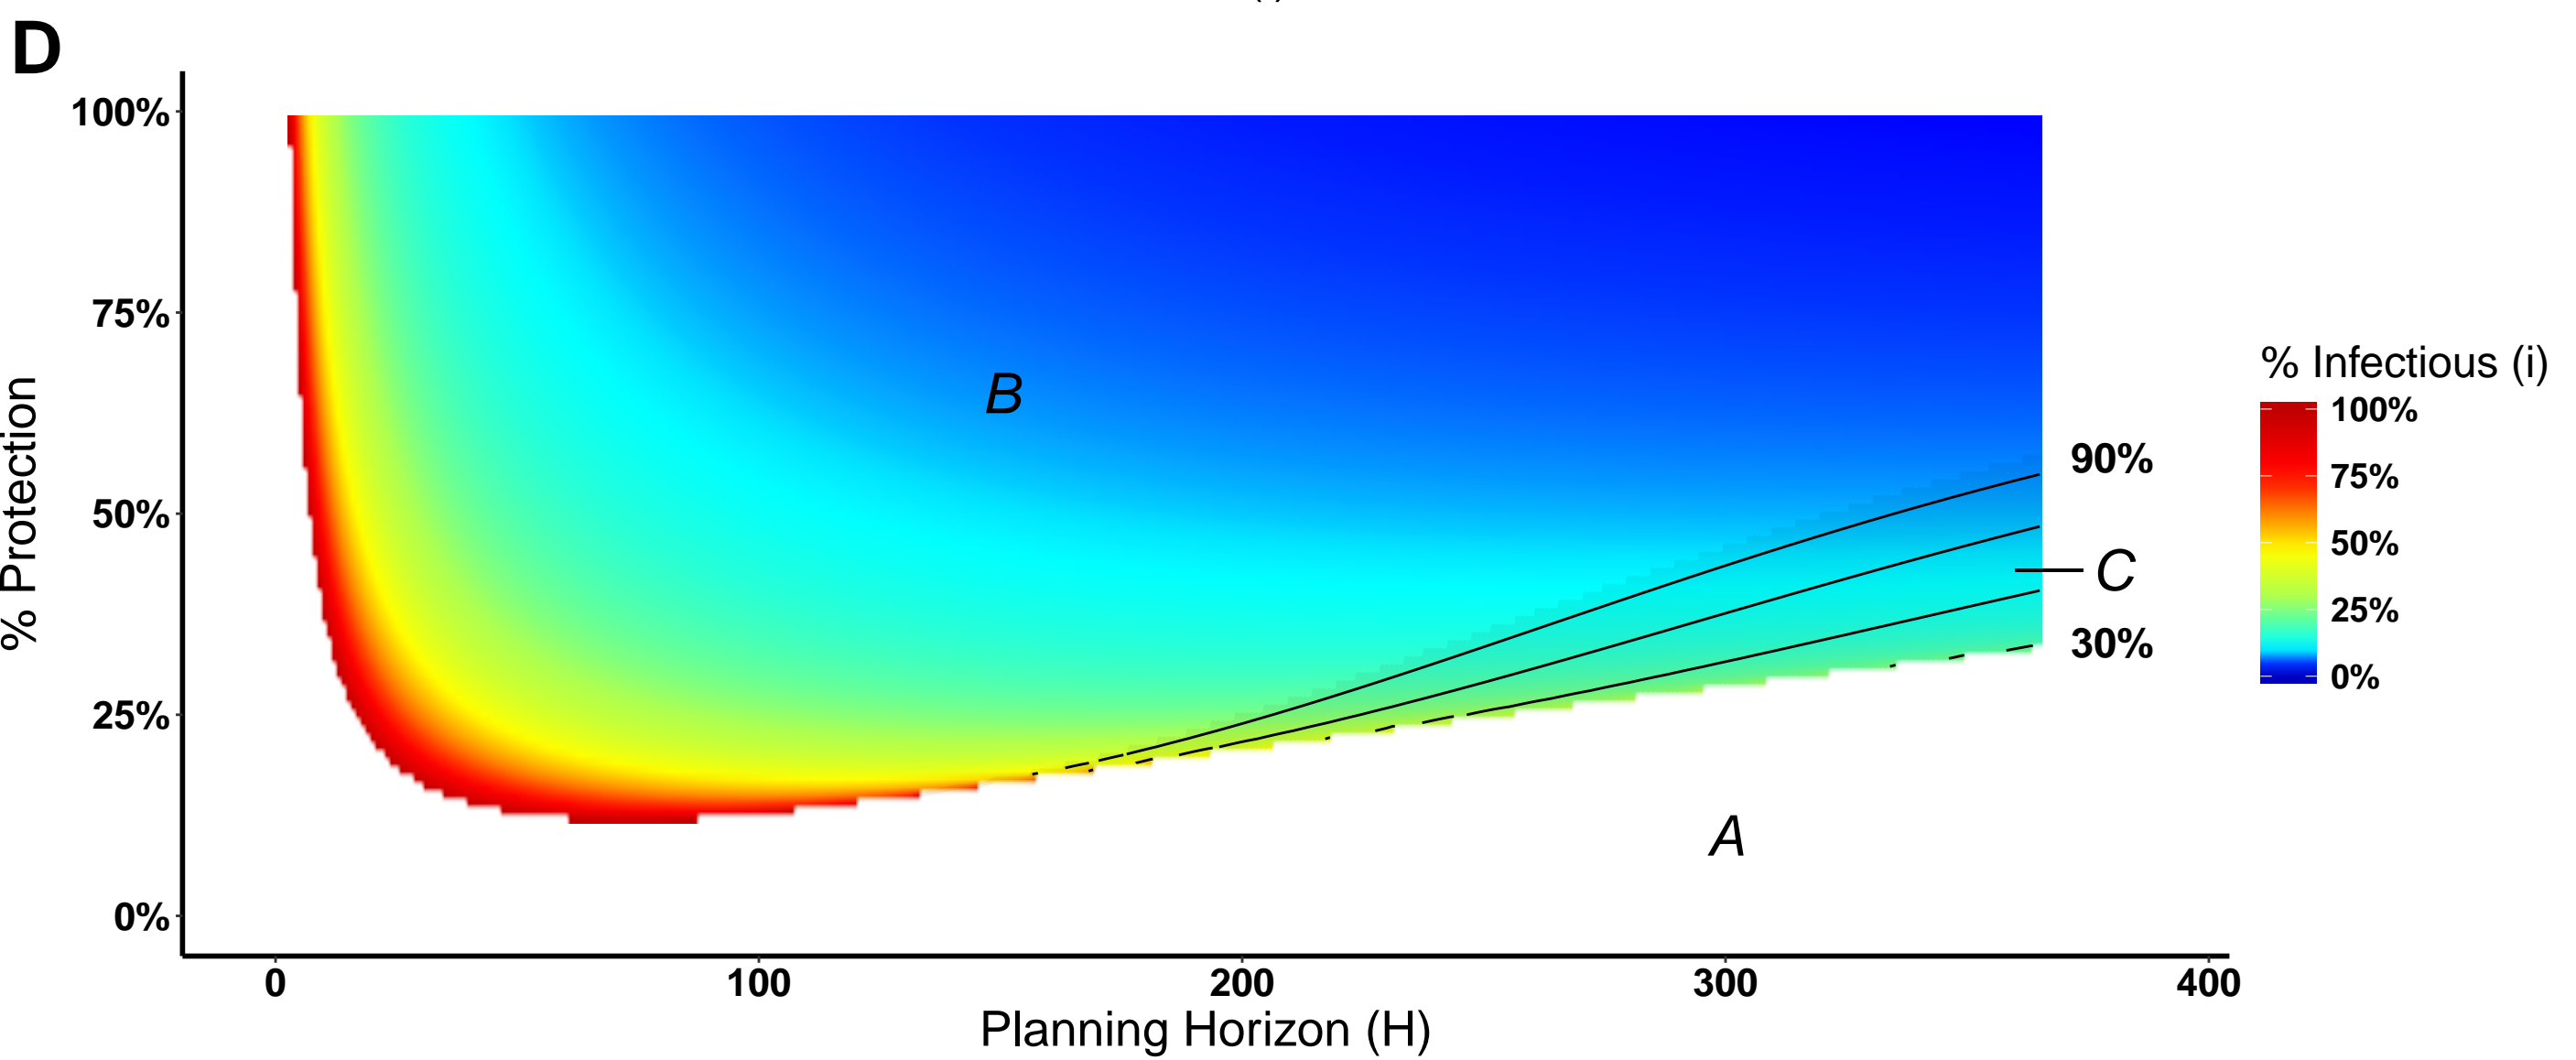

Supplement: supplemental_information.zip [file supplemental_information.zip]

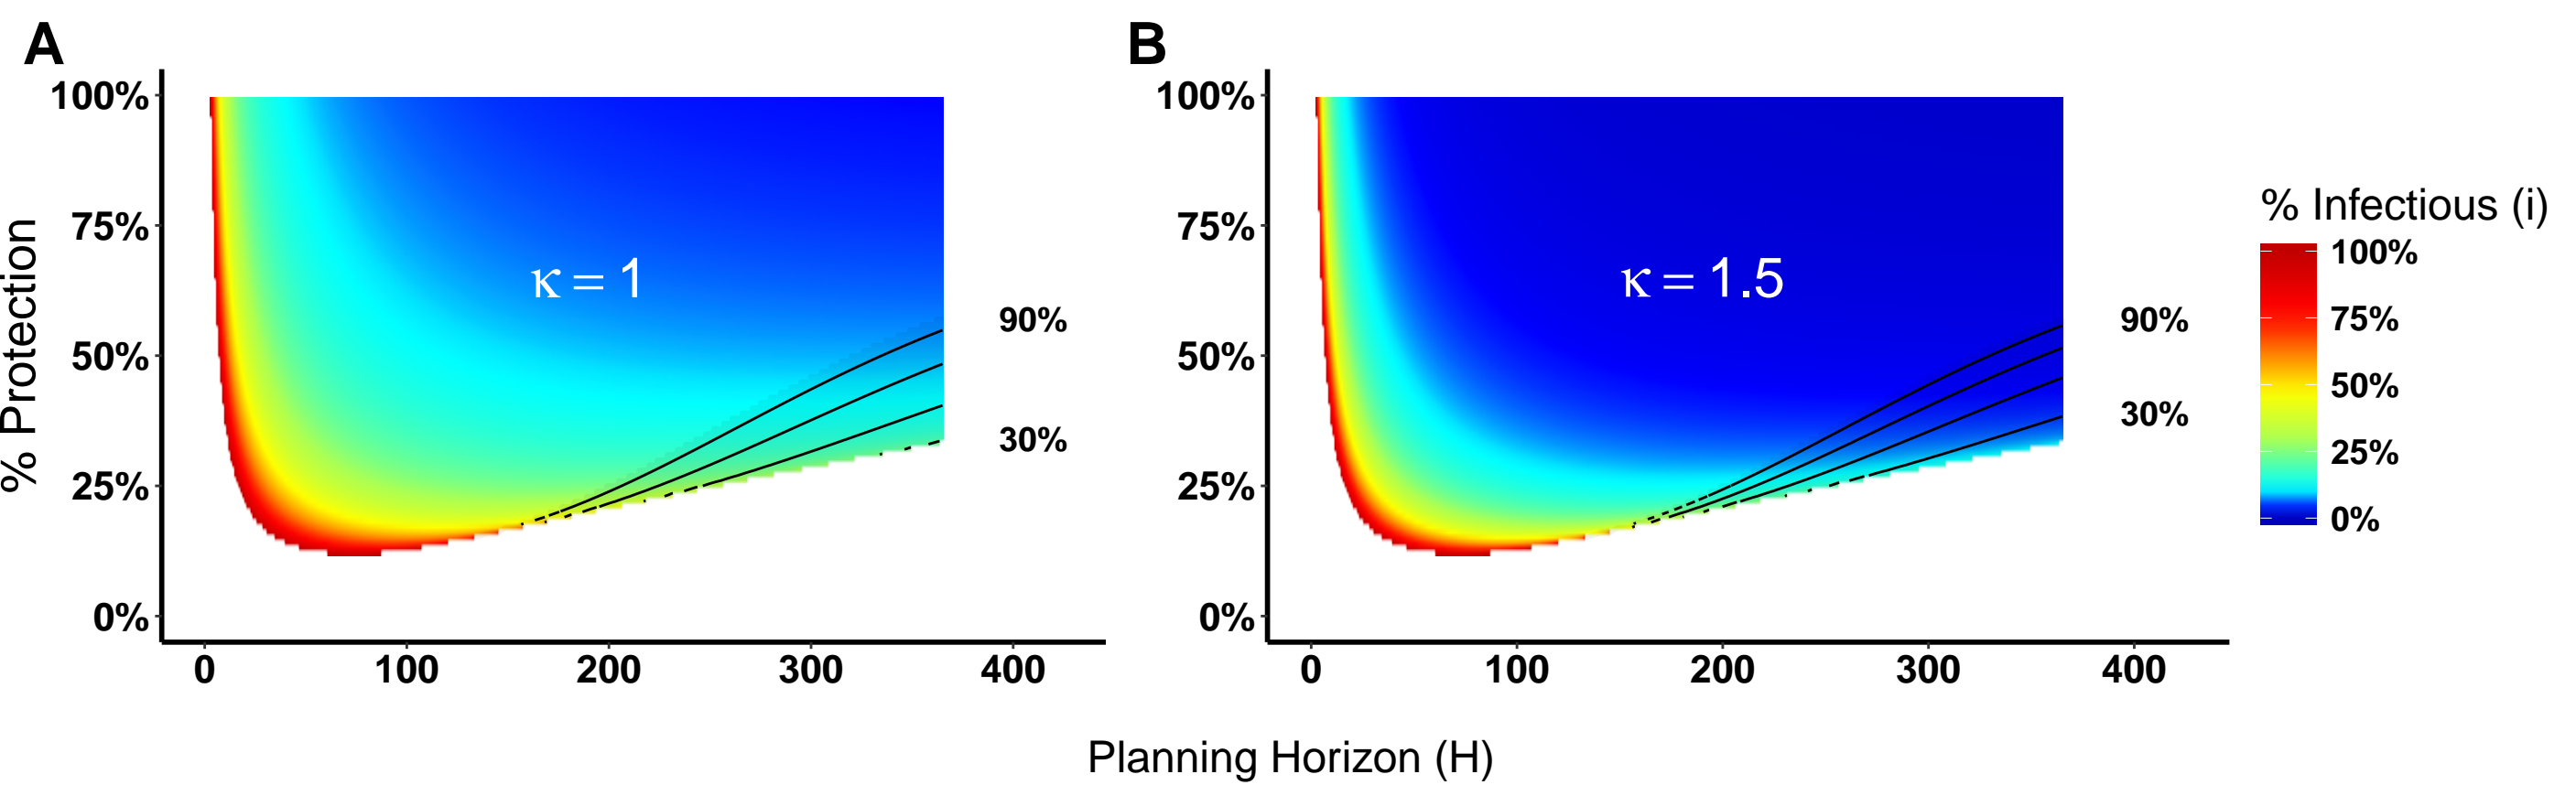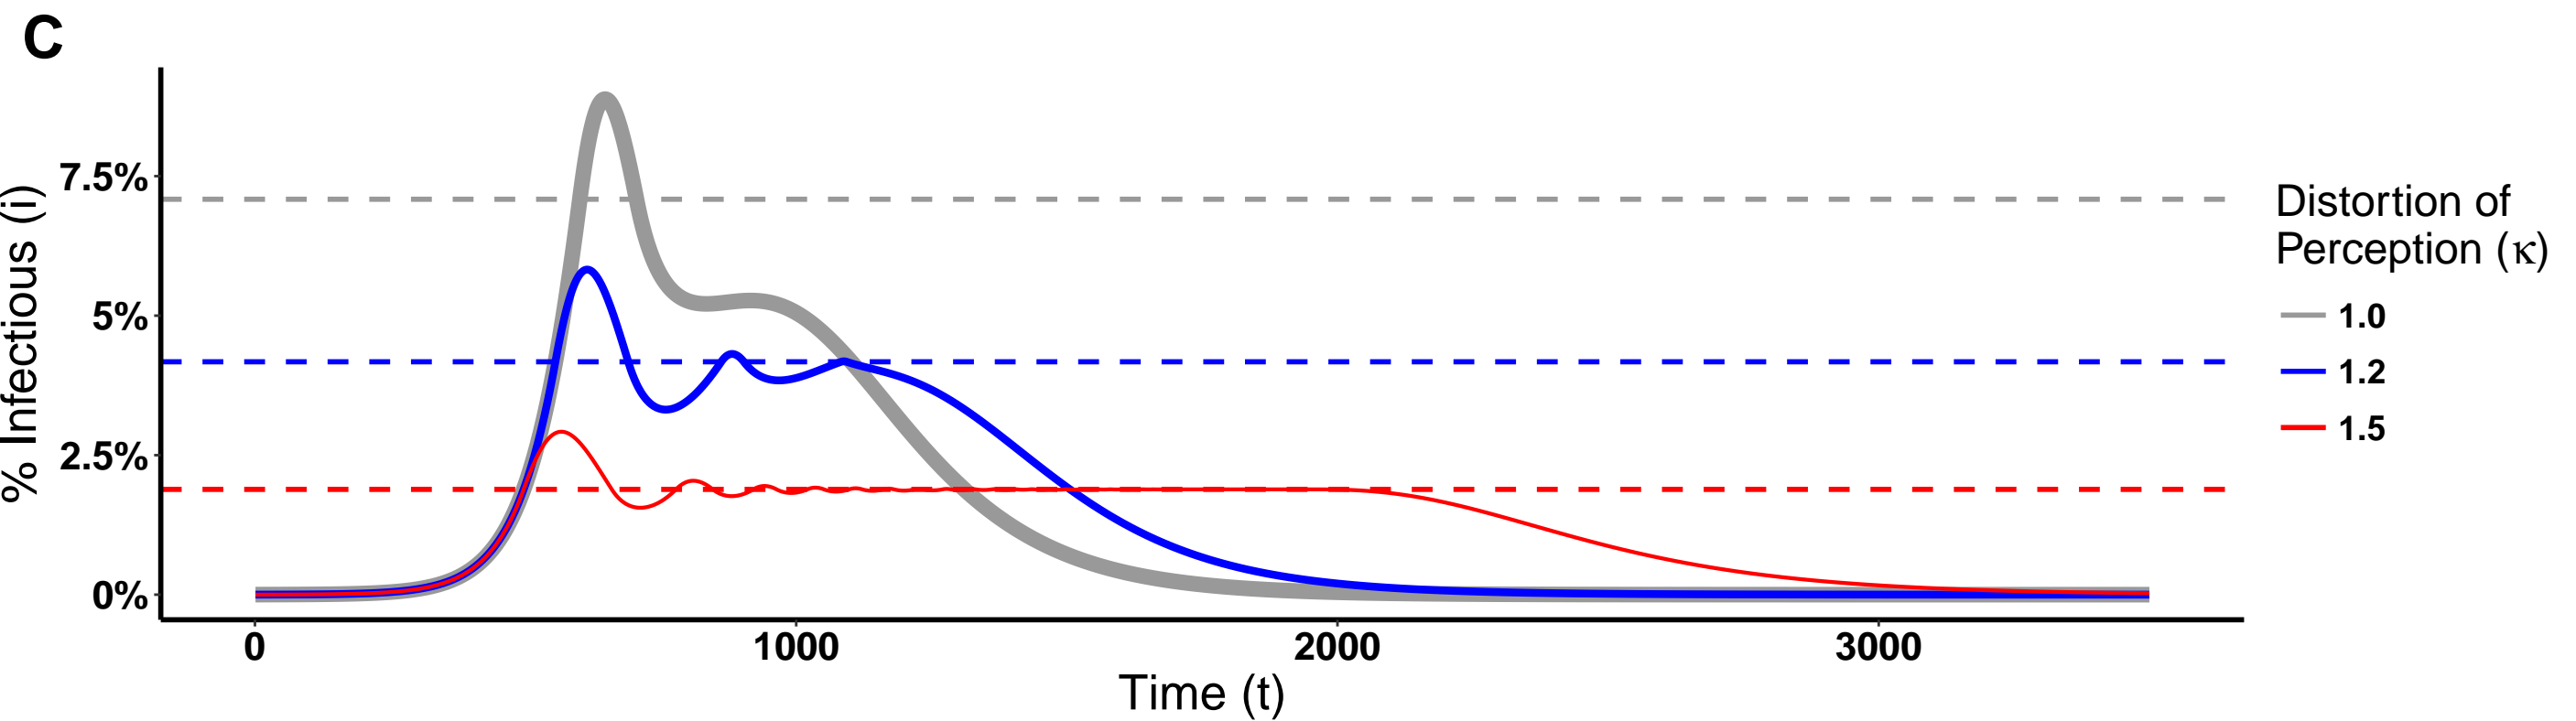

Supplement: supplemental_information.zip [file supplemental_information.zip]

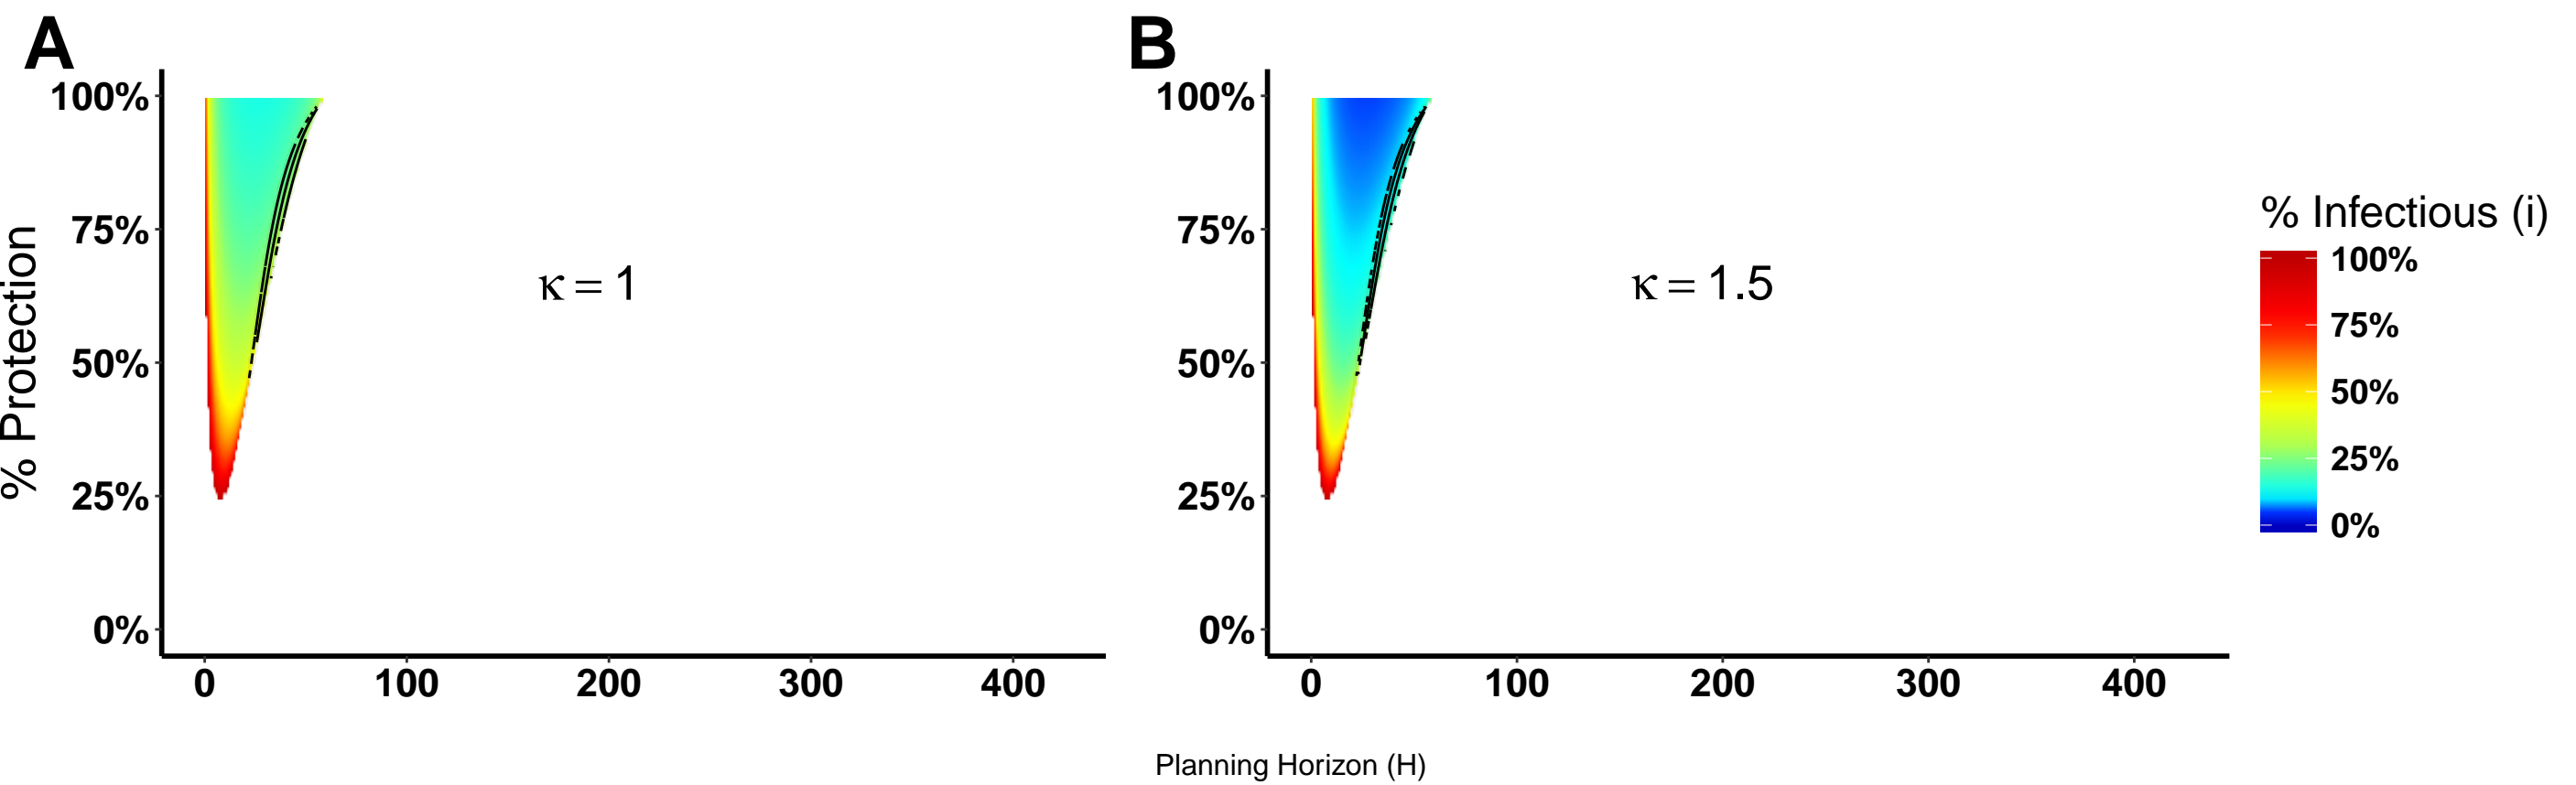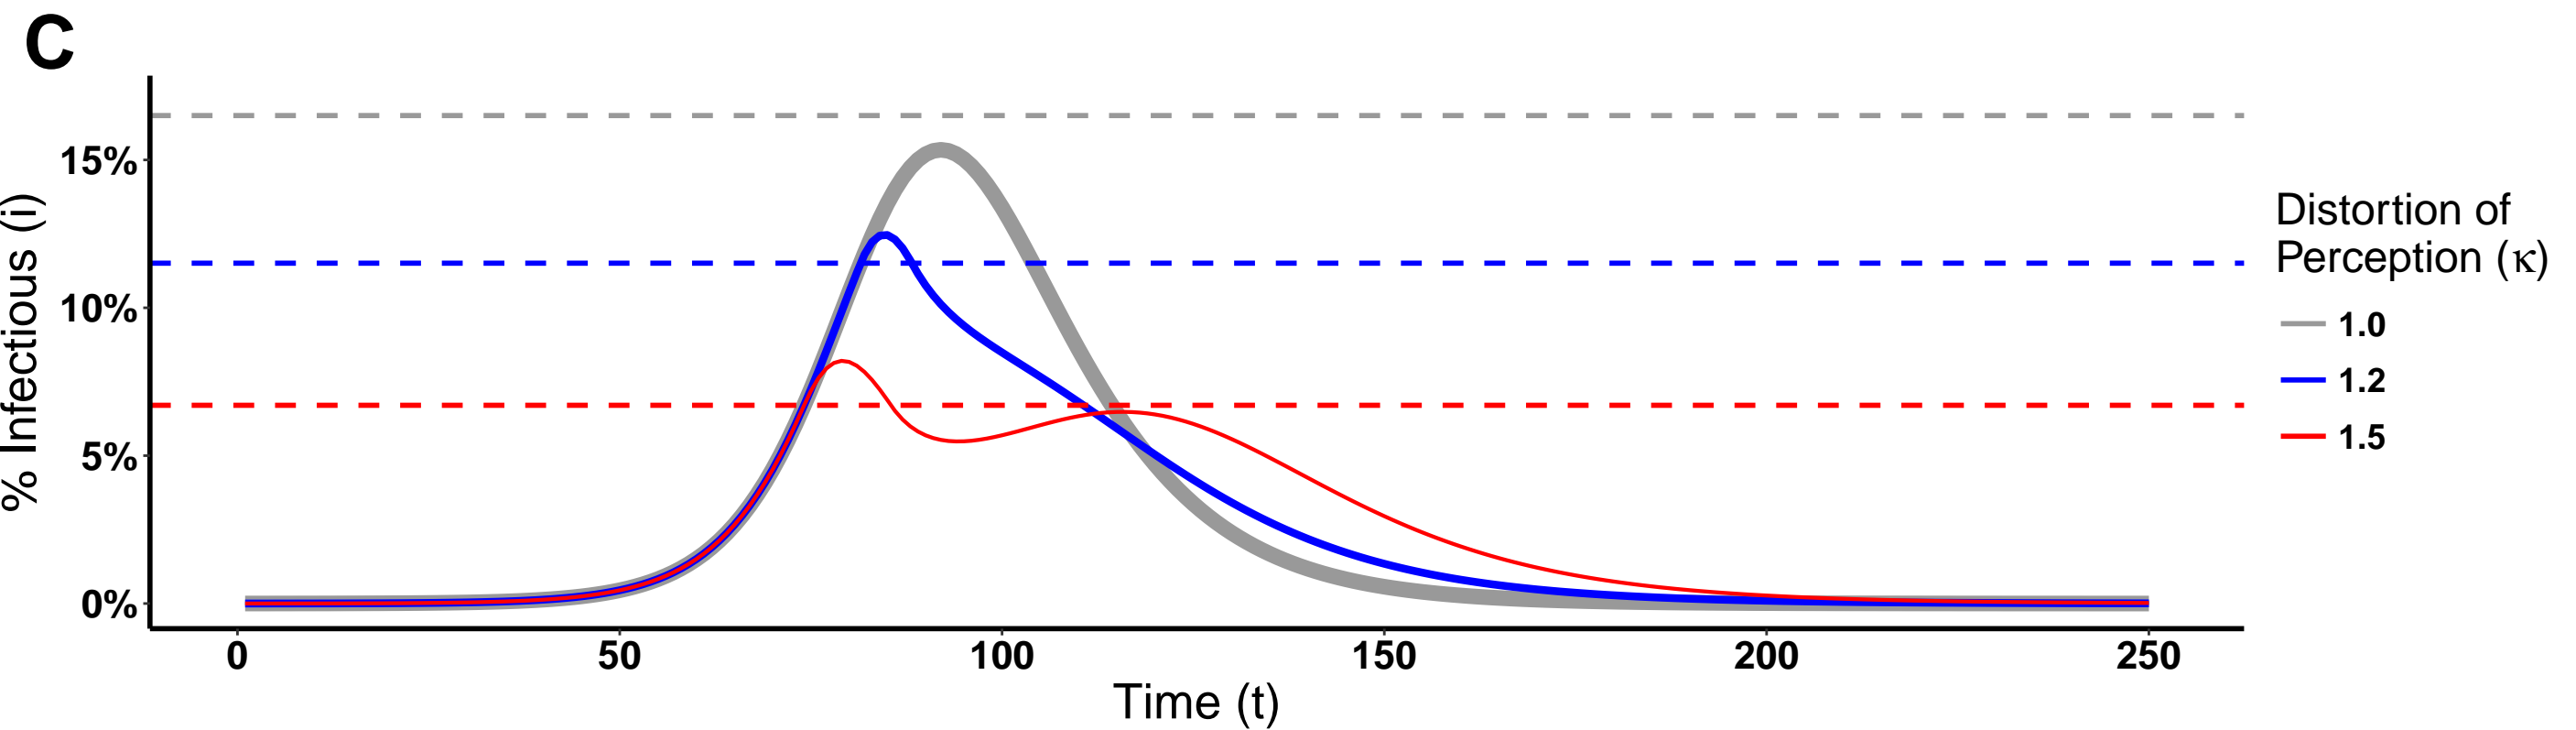

Supplement: supplemental_information.zip [file supplemental_information.zip]

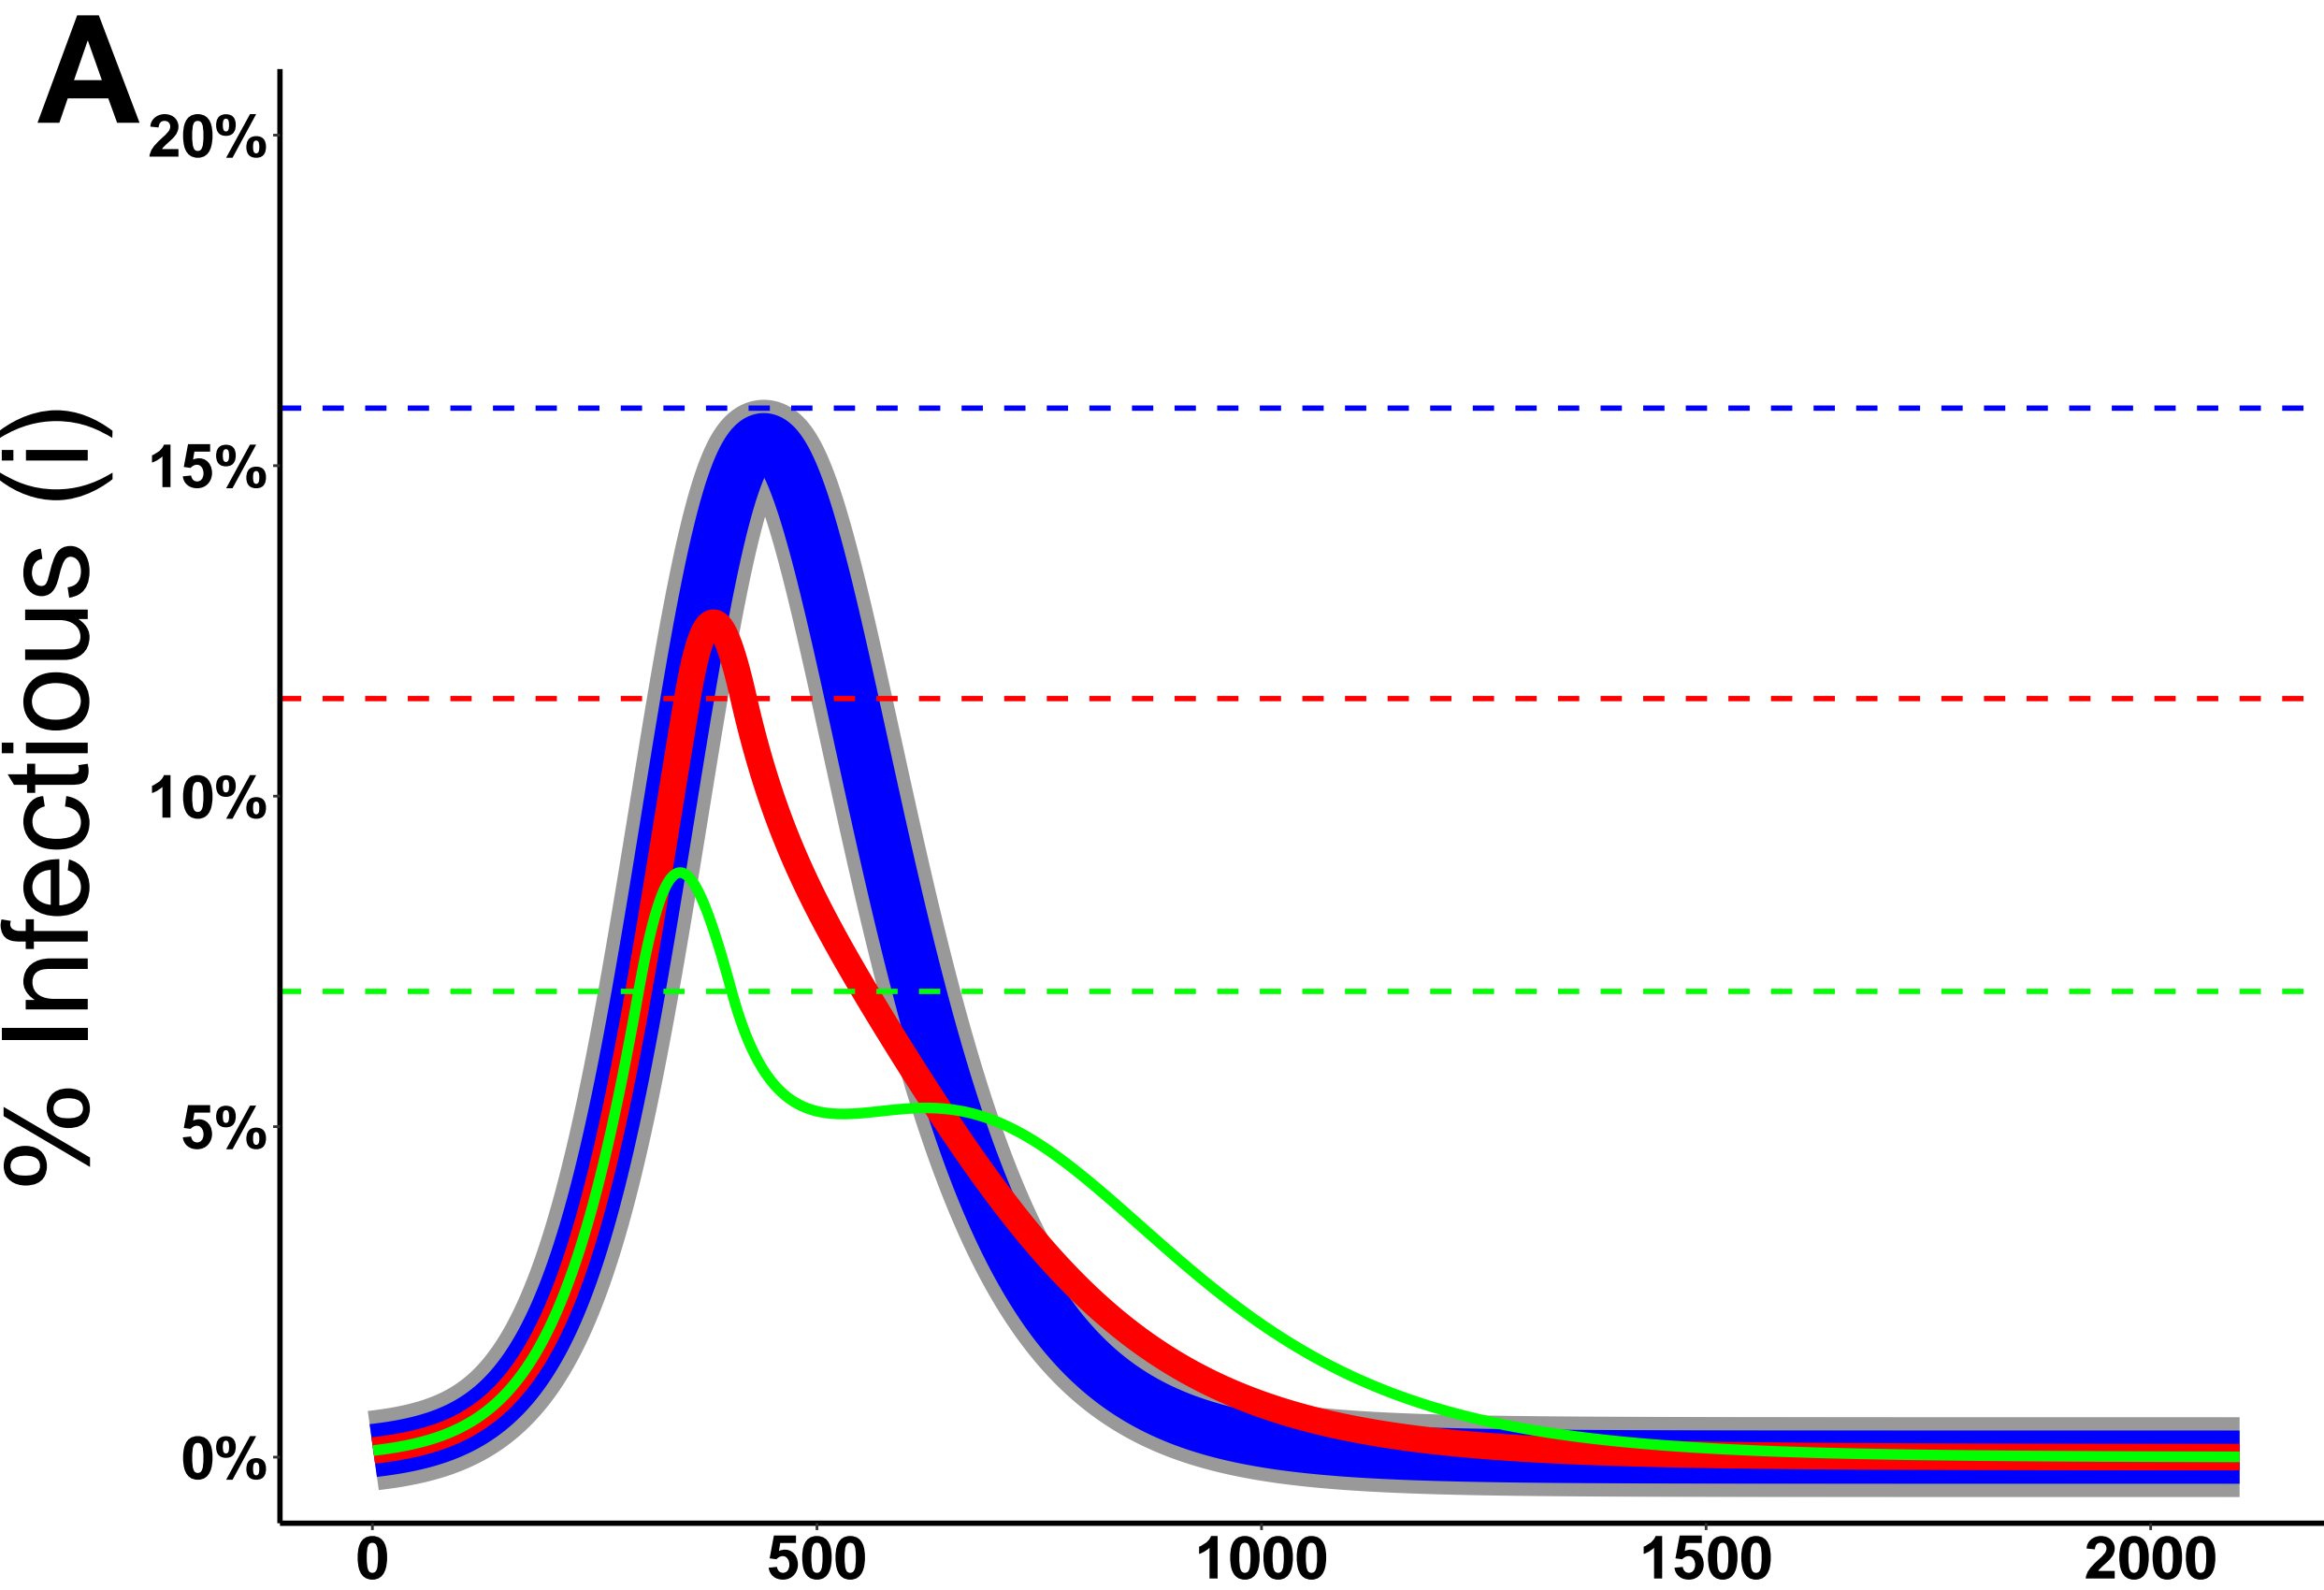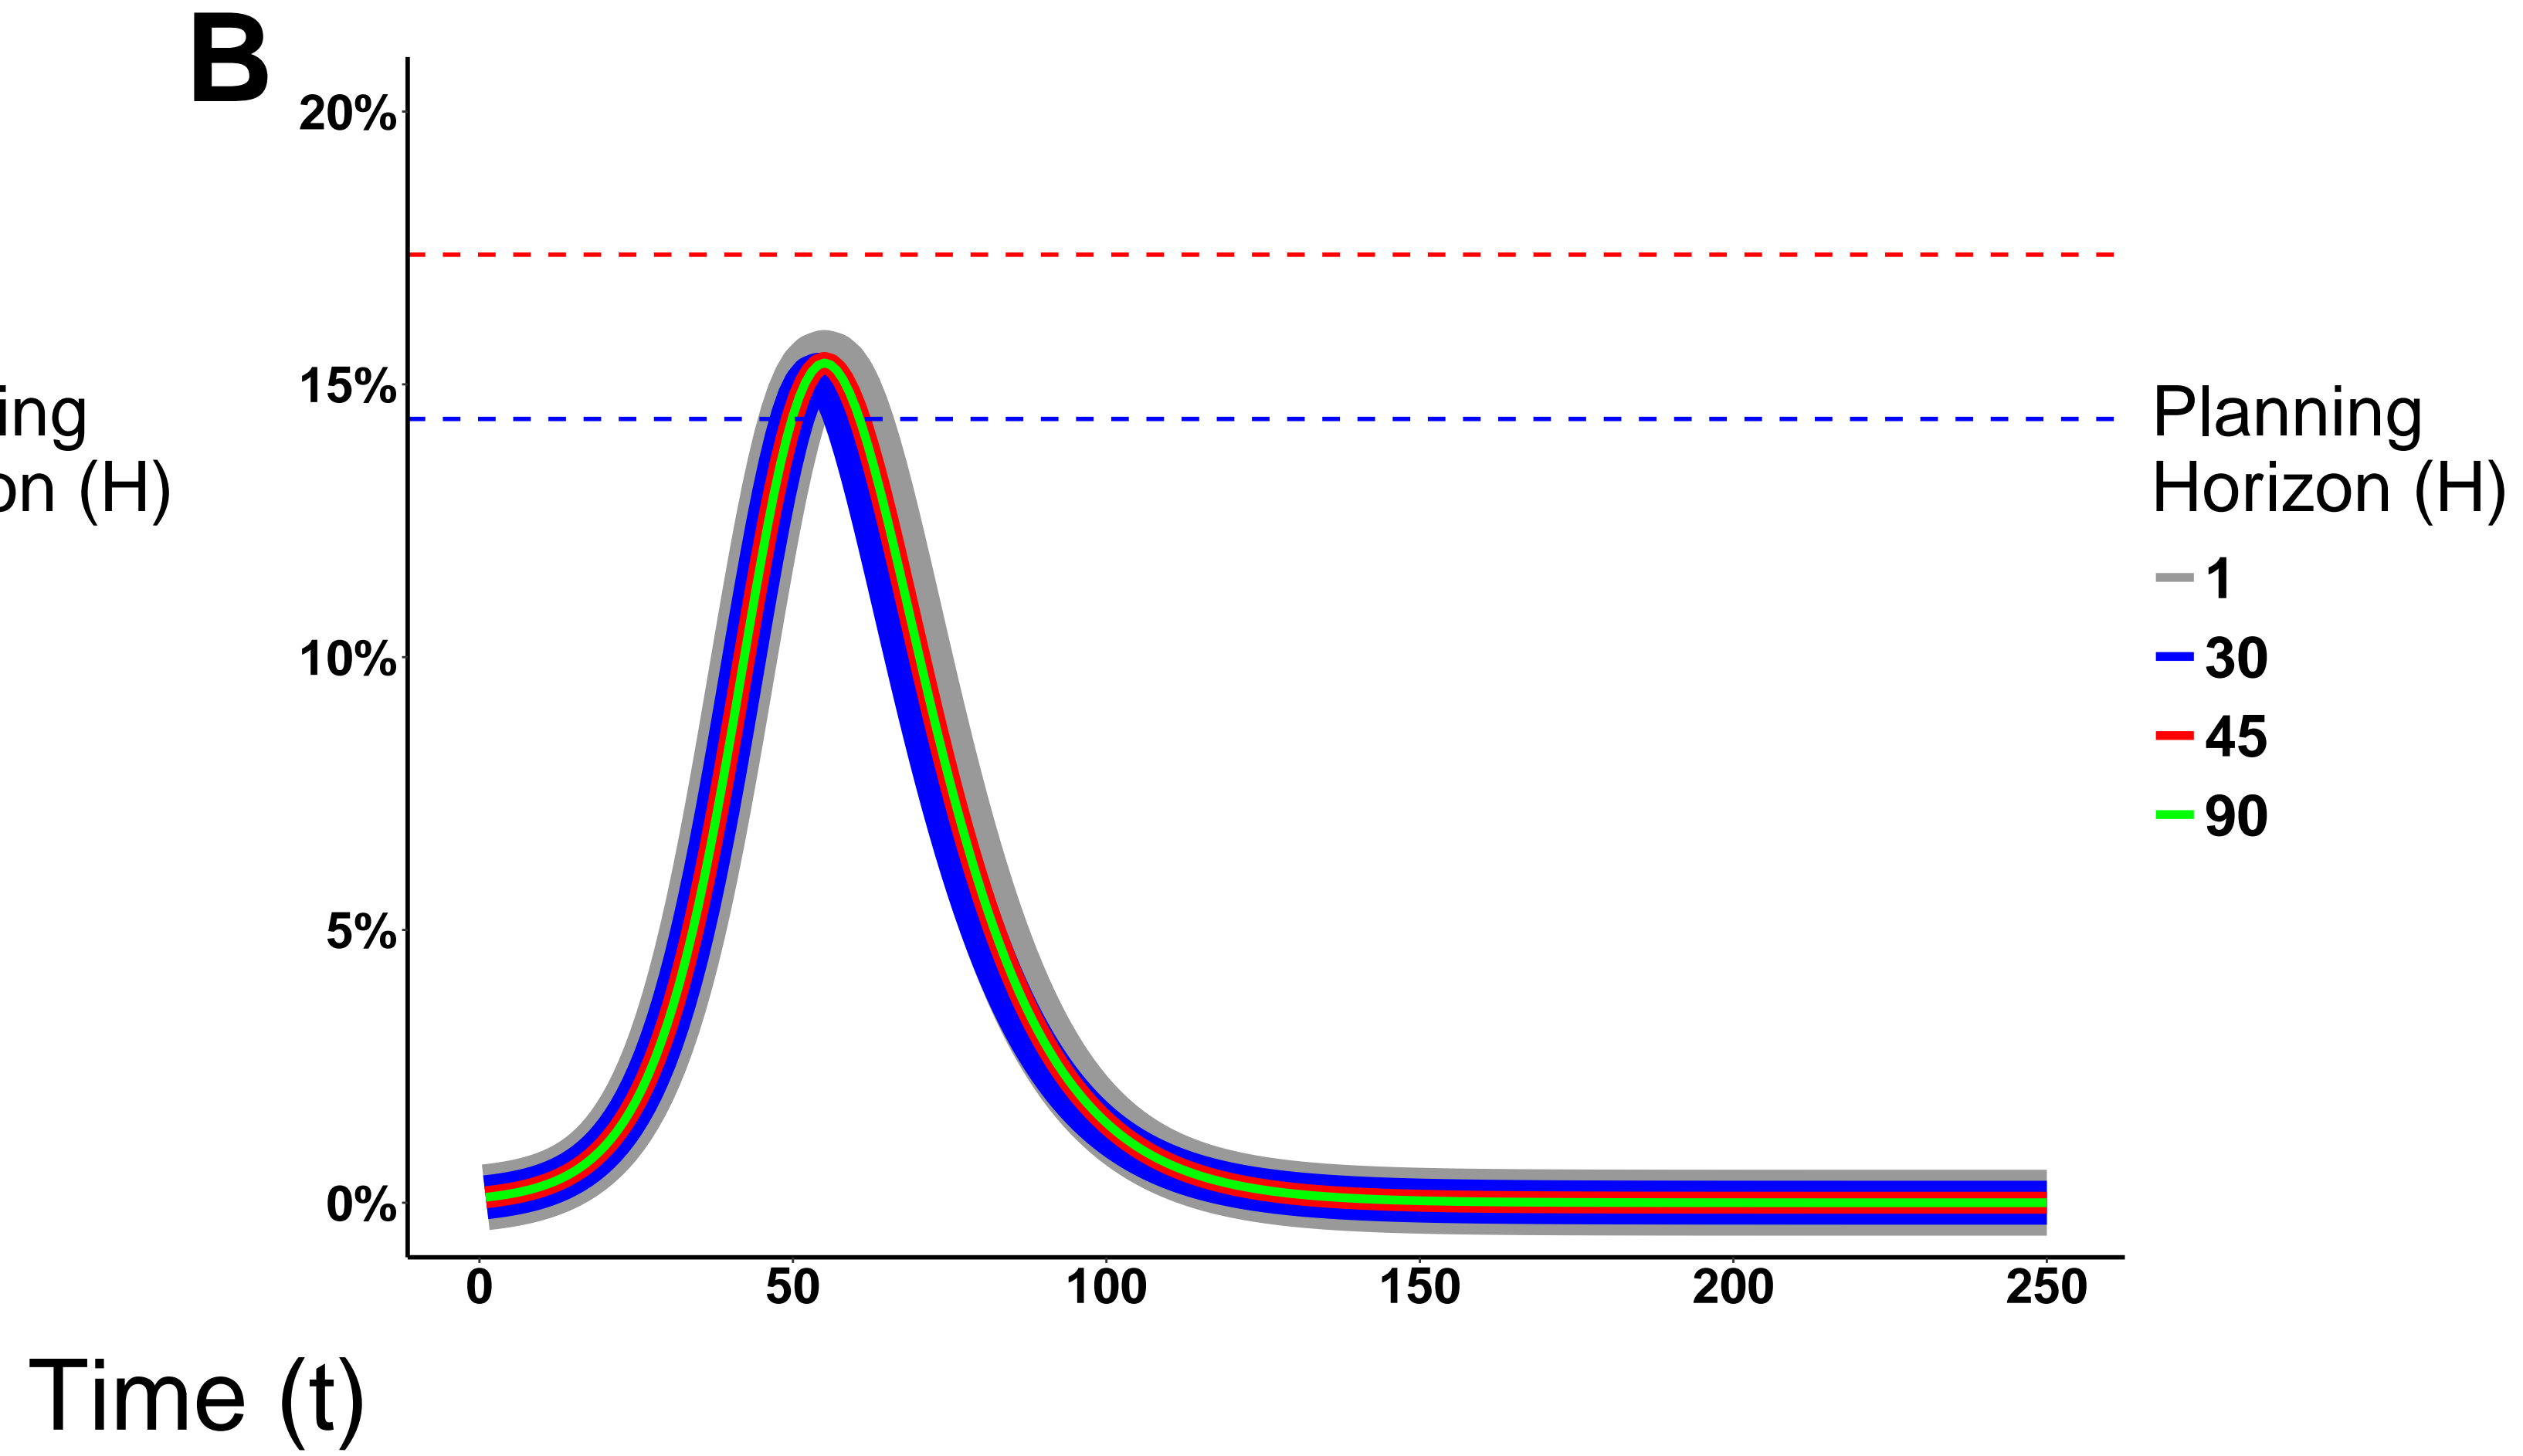

Supplement: supplemental_information.zip [file supplemental_information.zip]

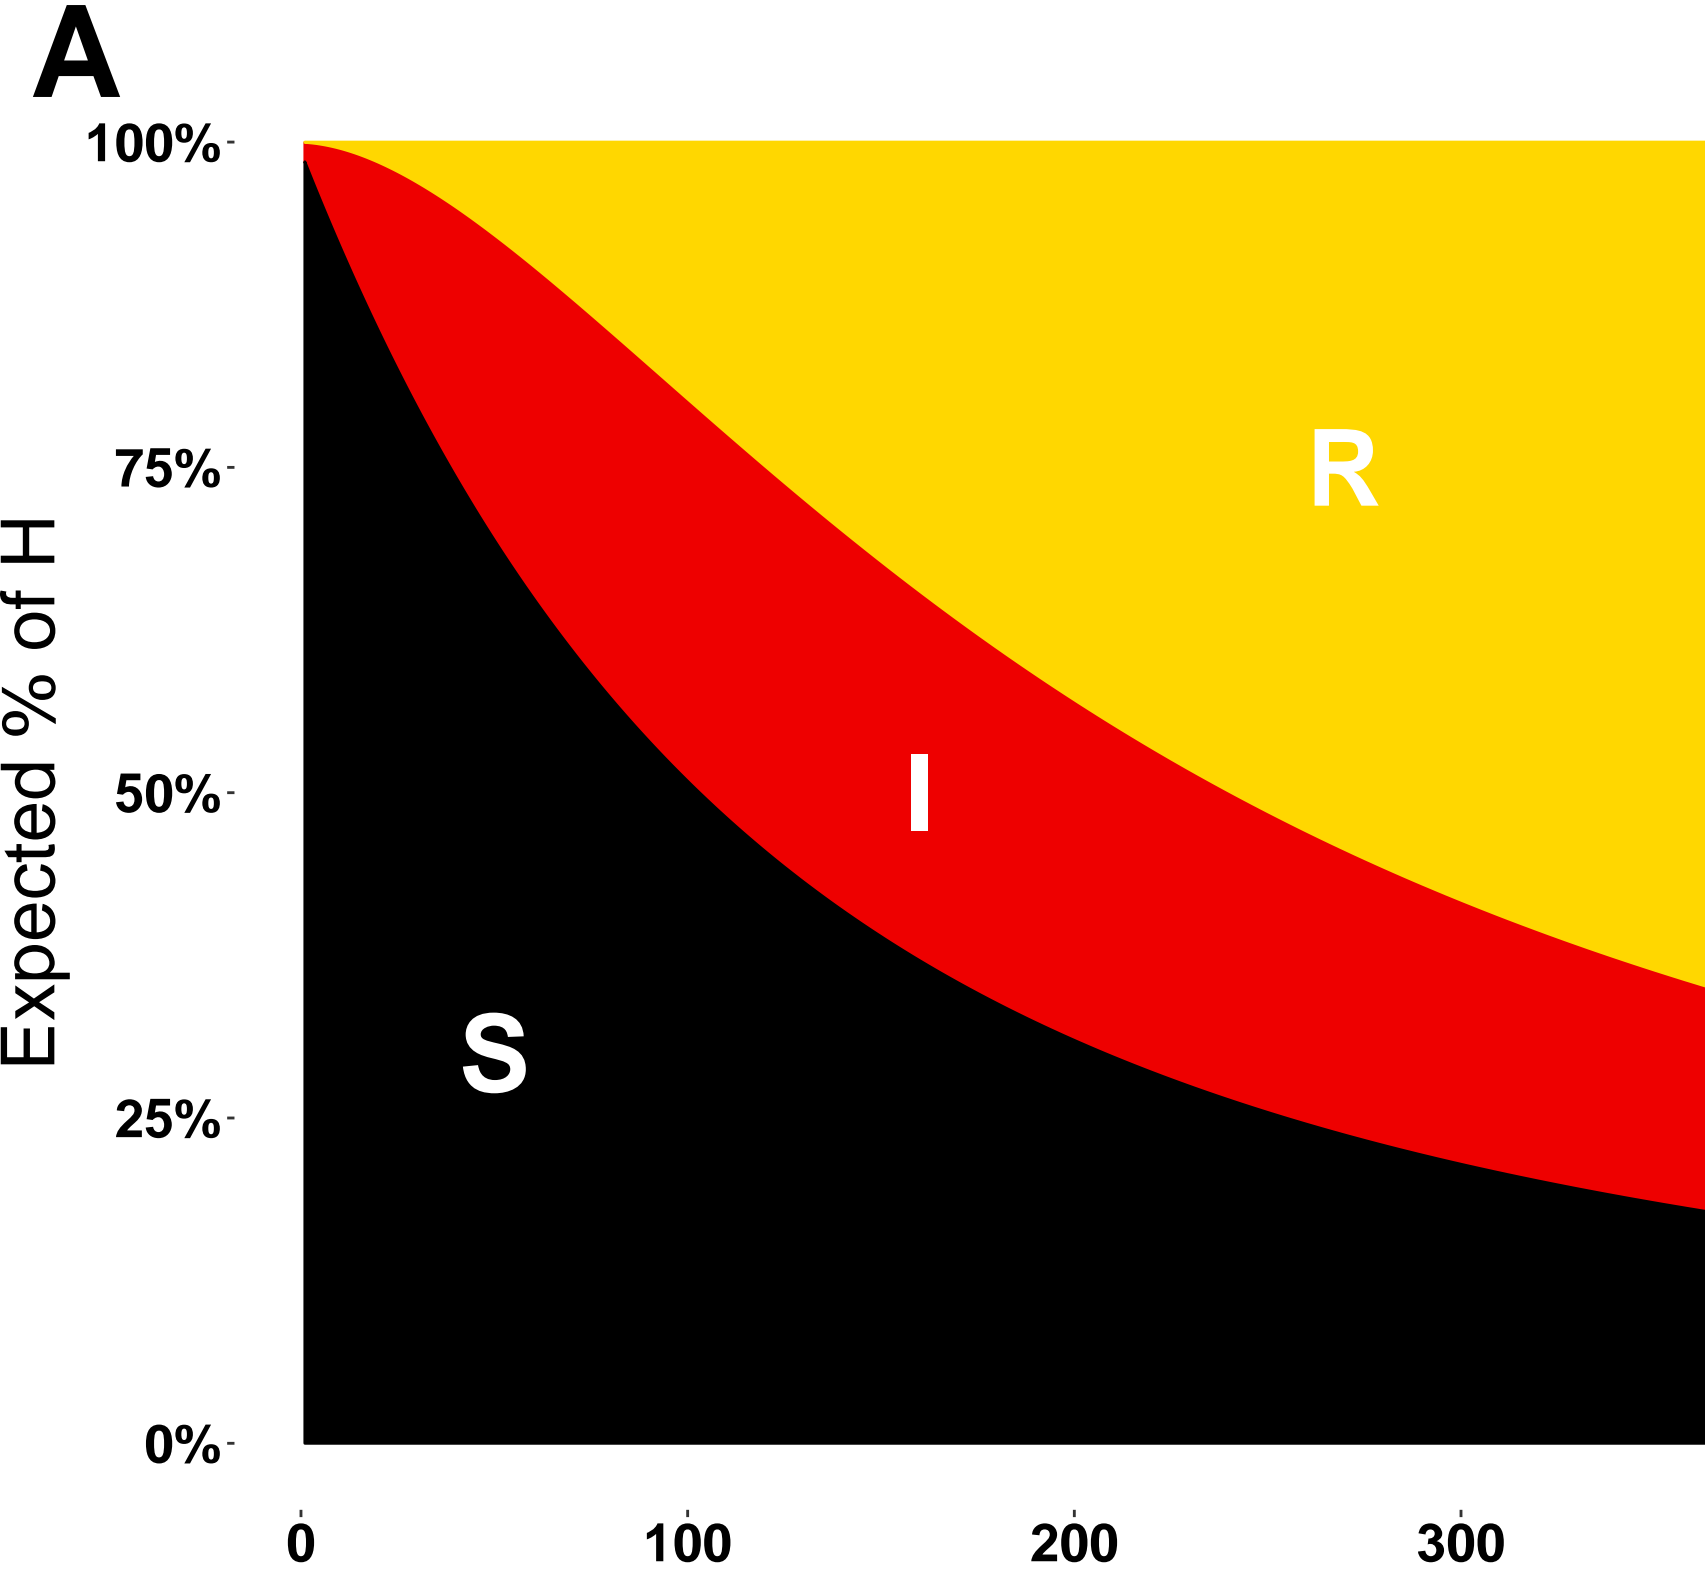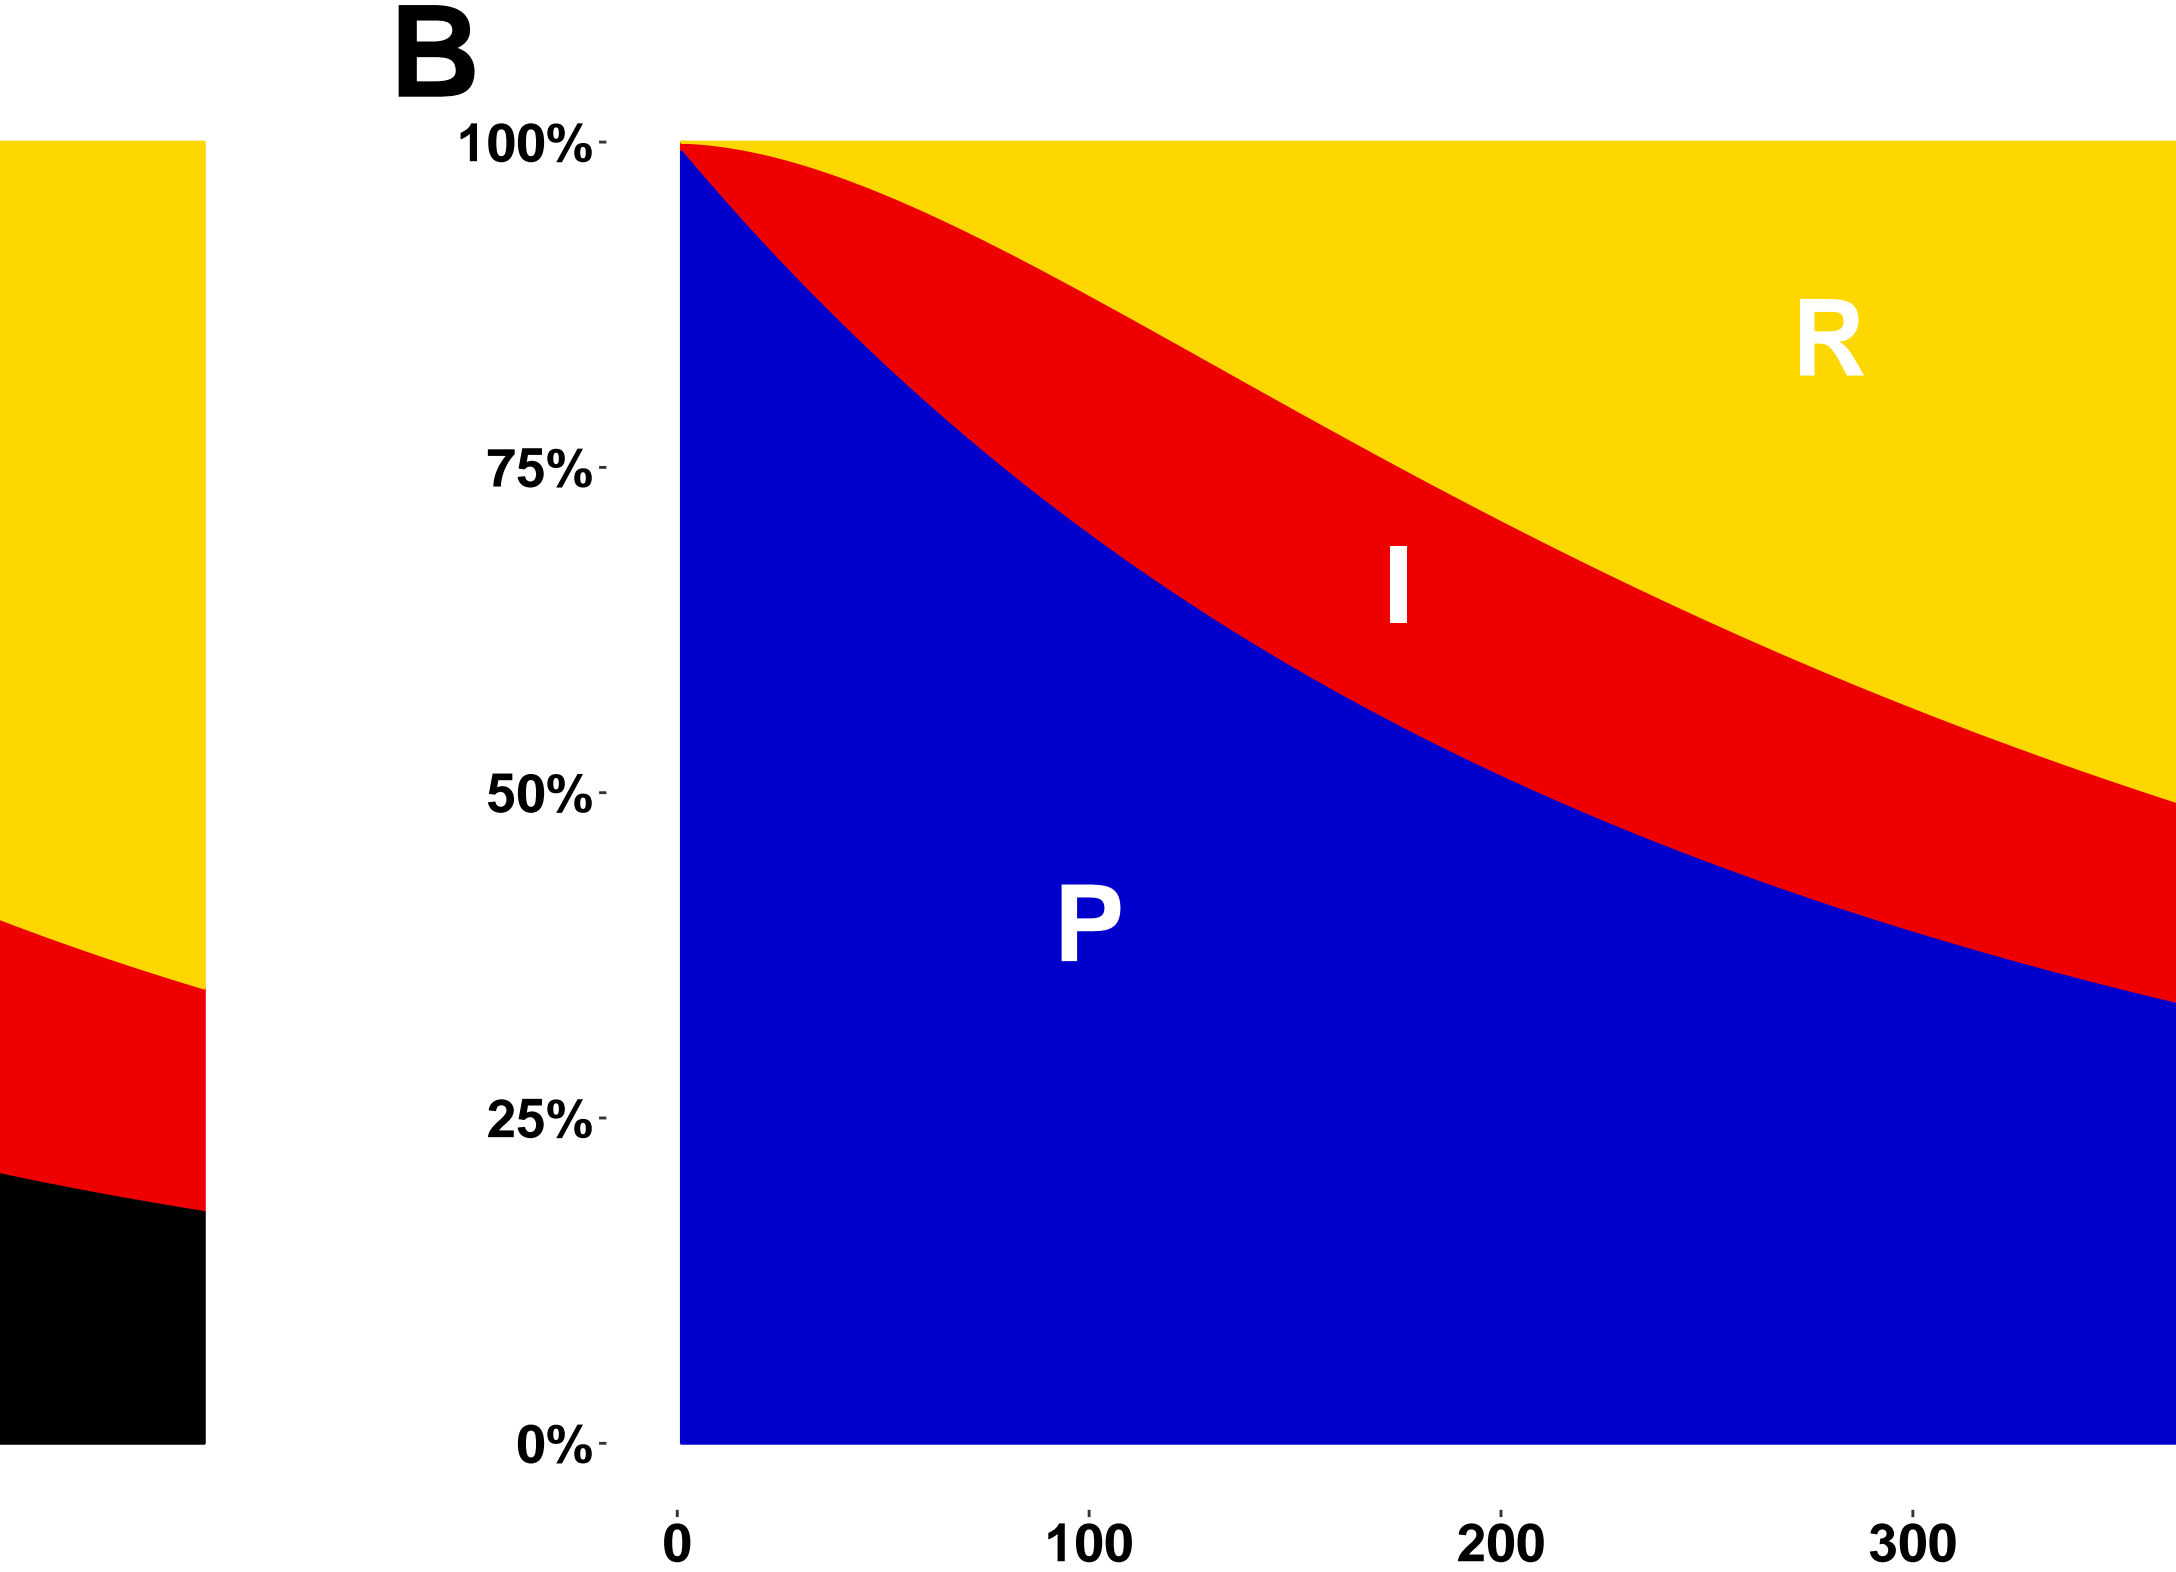

Planning Horizon (H)

Supplement: supplemental_information.zip [file supplemental_information.zip]

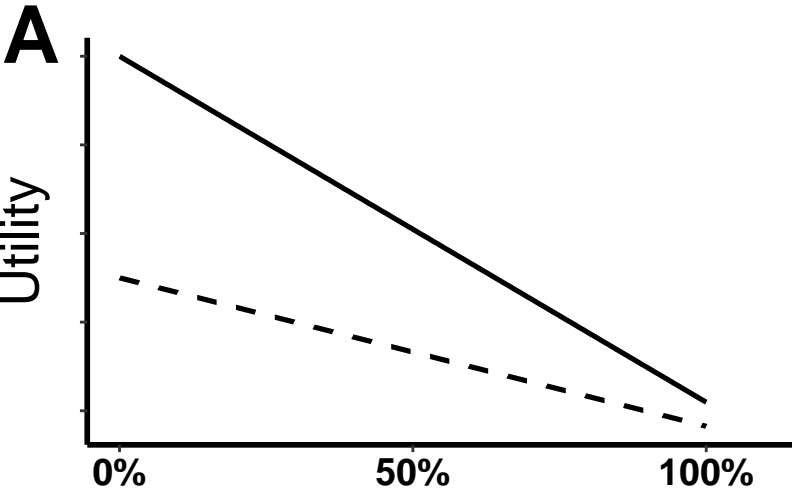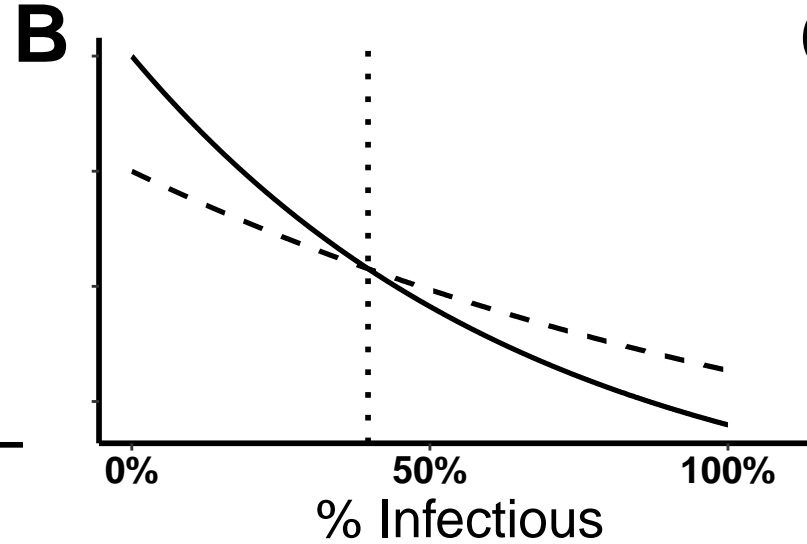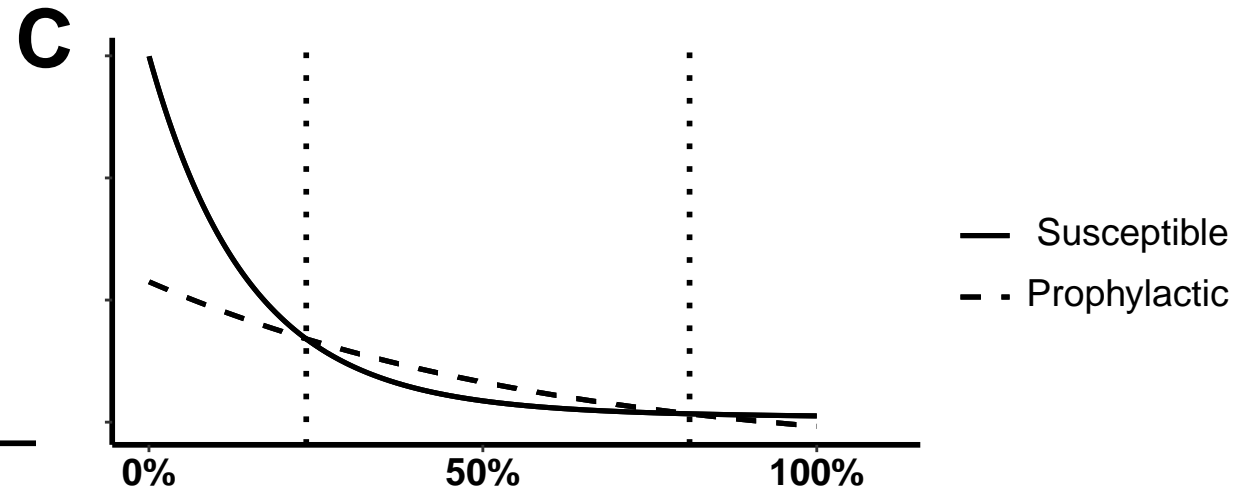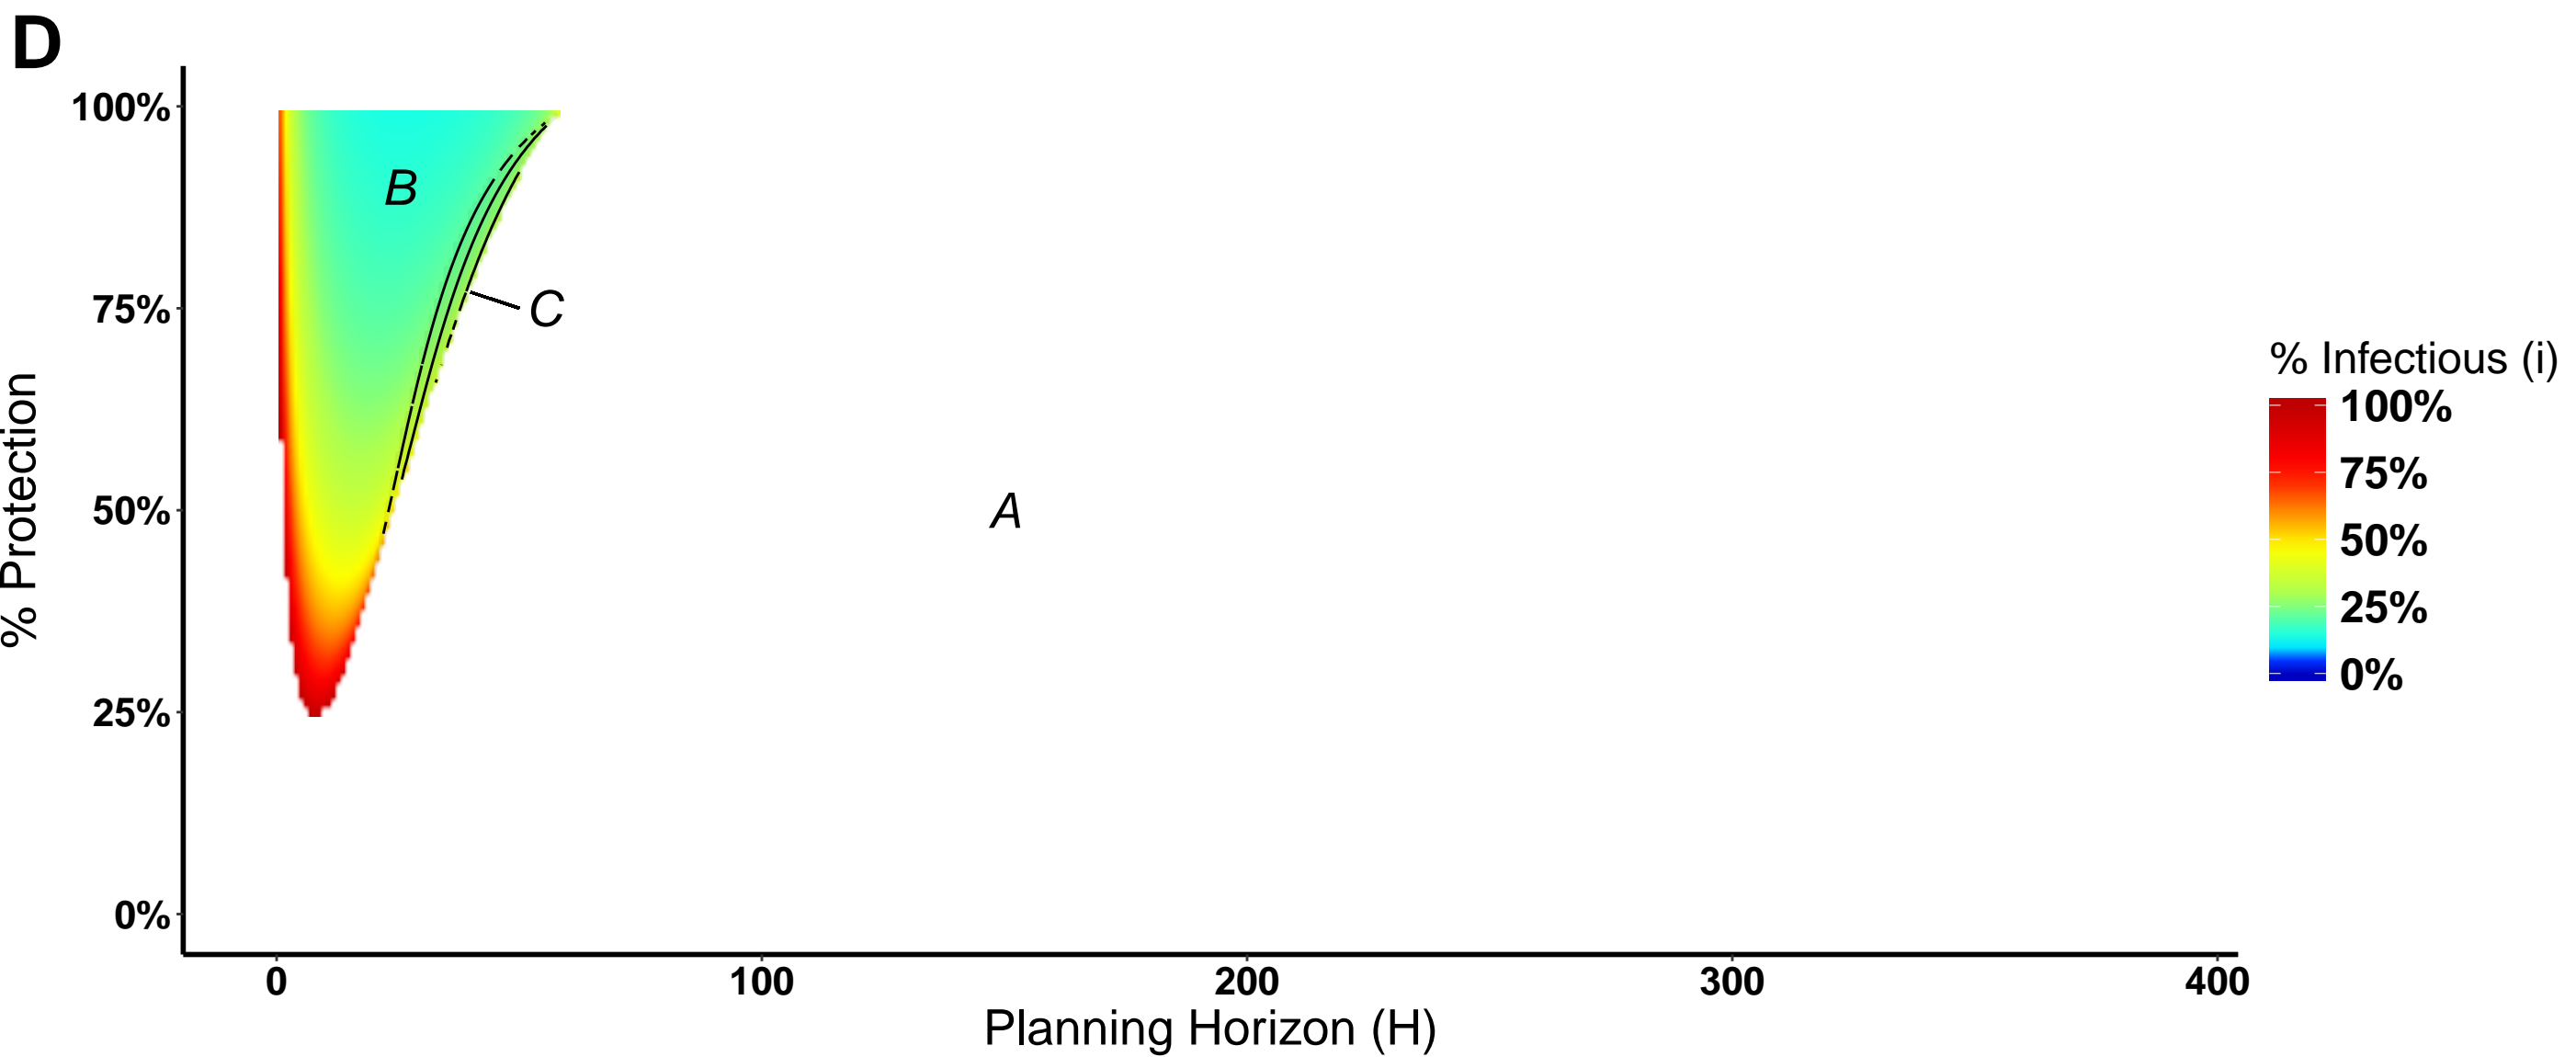

Supplement: supplemental_information.zip [file supplemental_information.zip]

% Infectious (i)

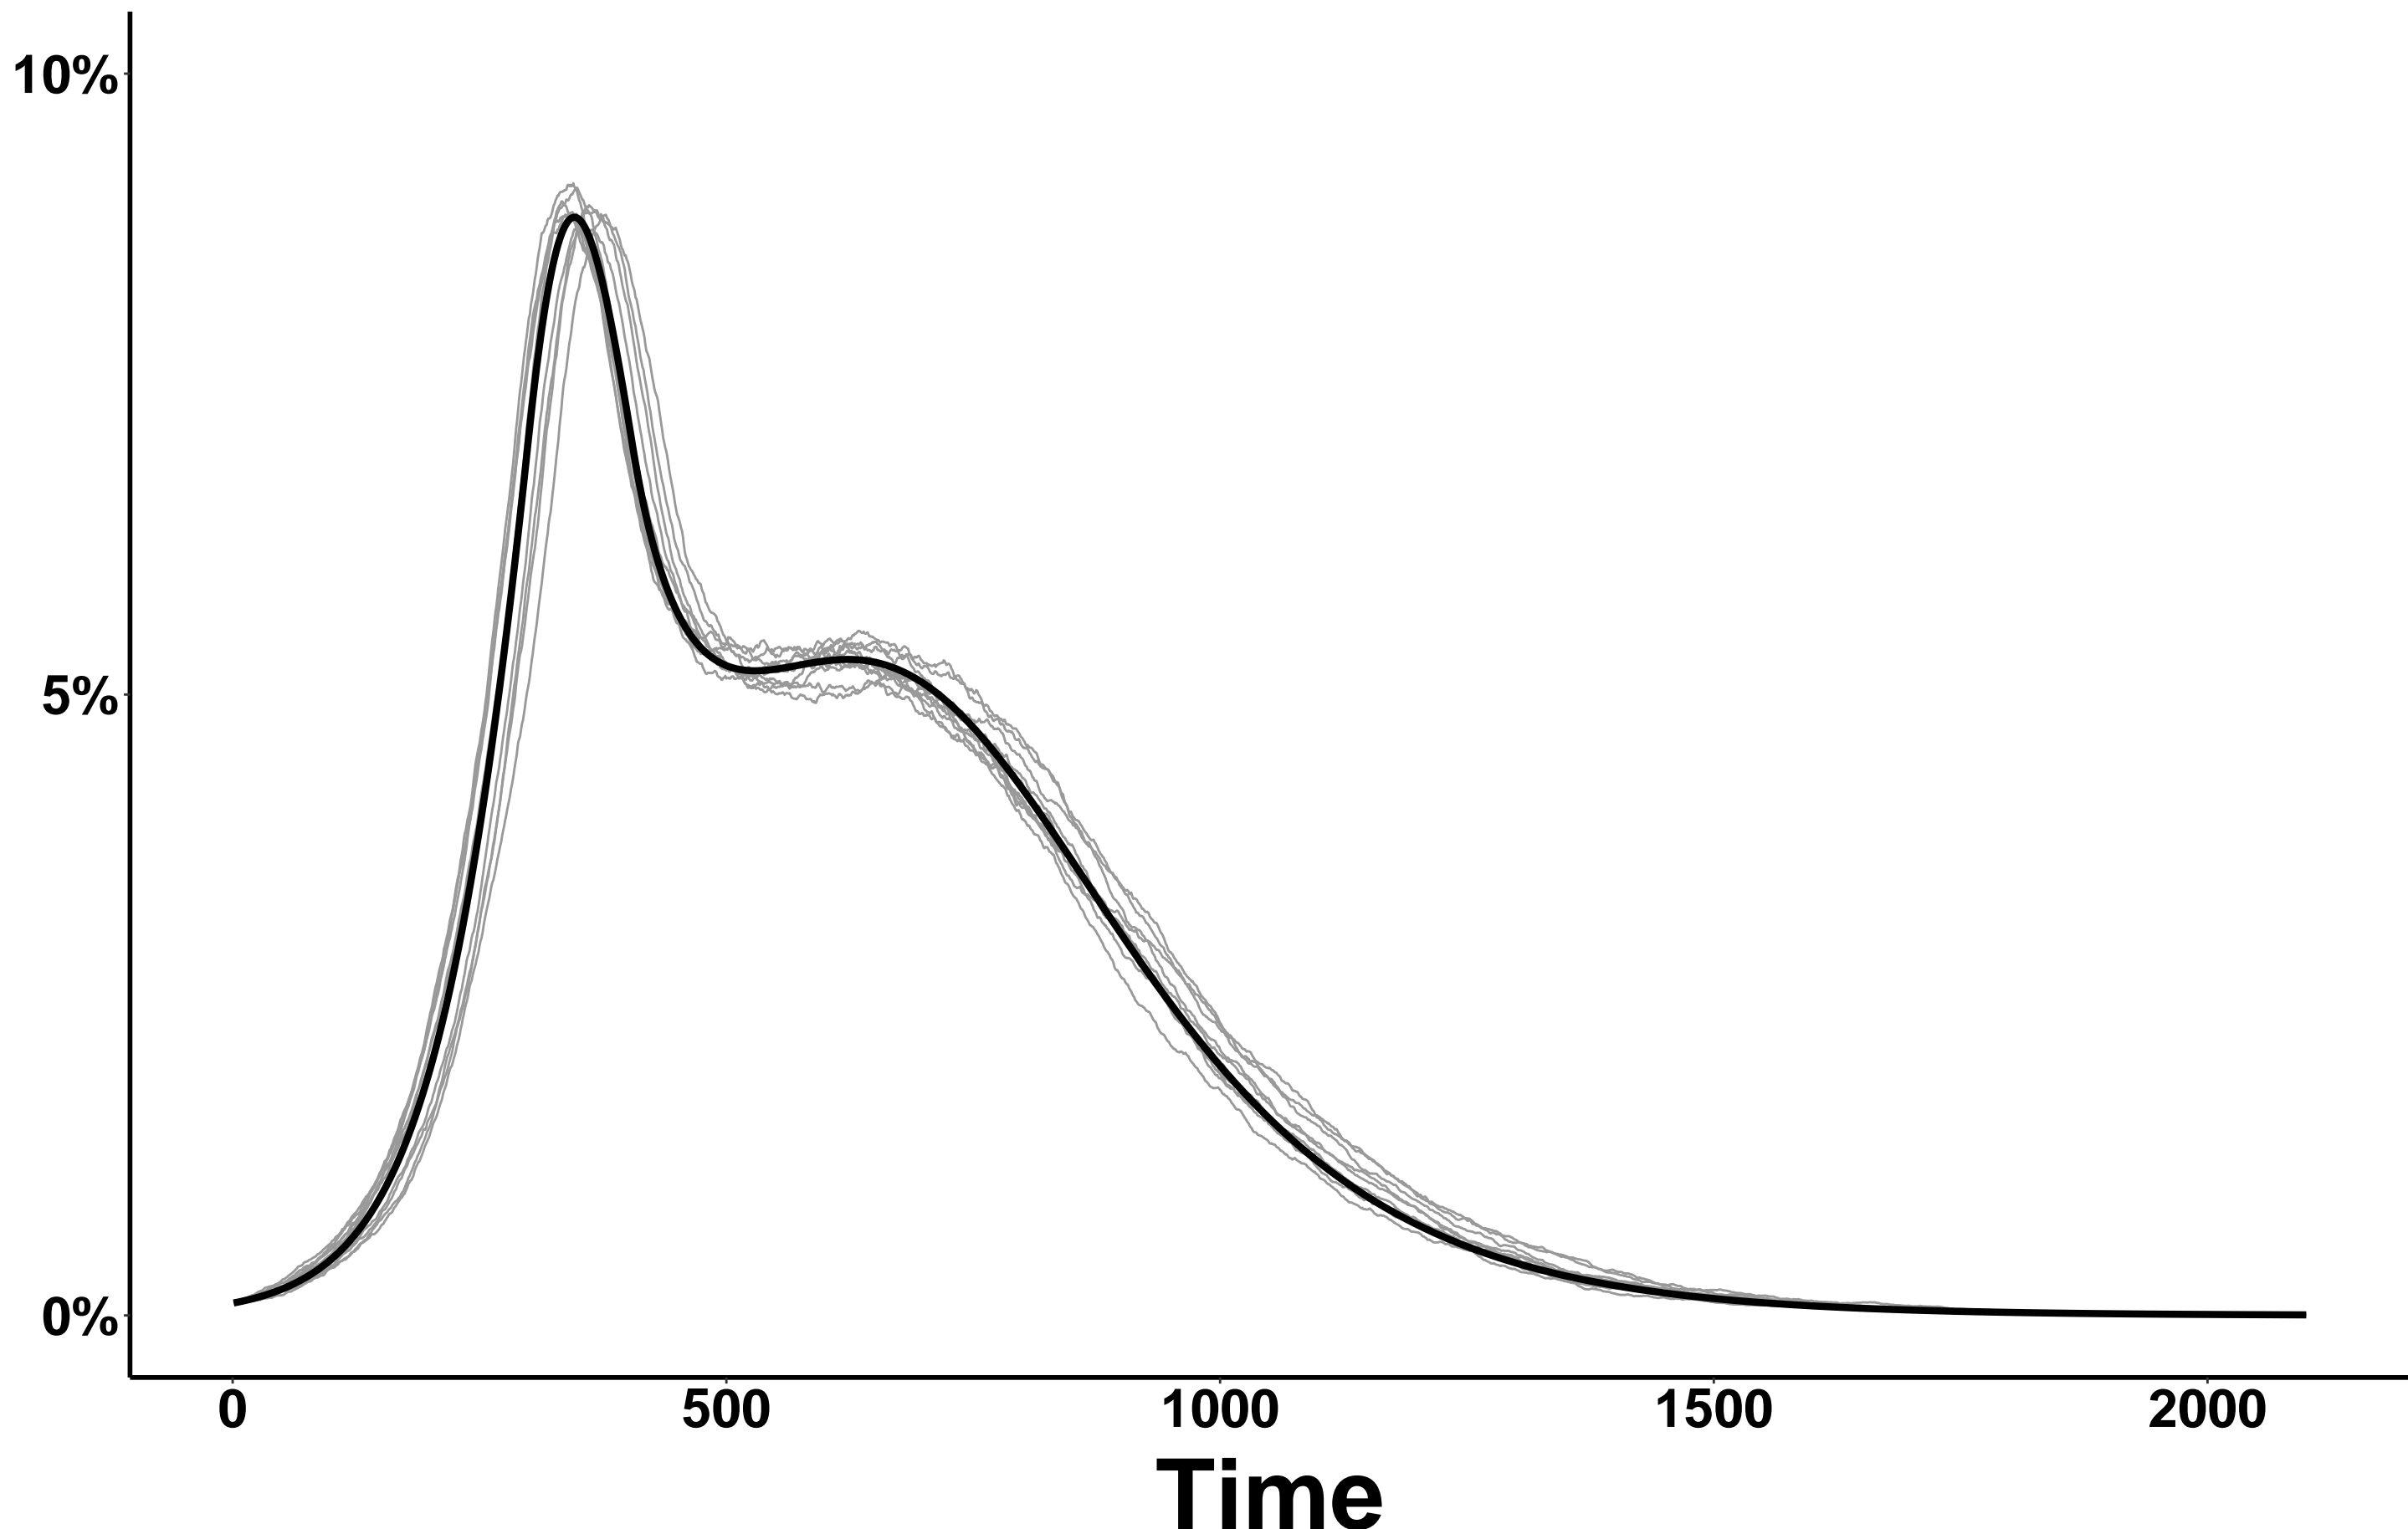

Supplement: supplemental_information.zip [file supplemental_information.zip]

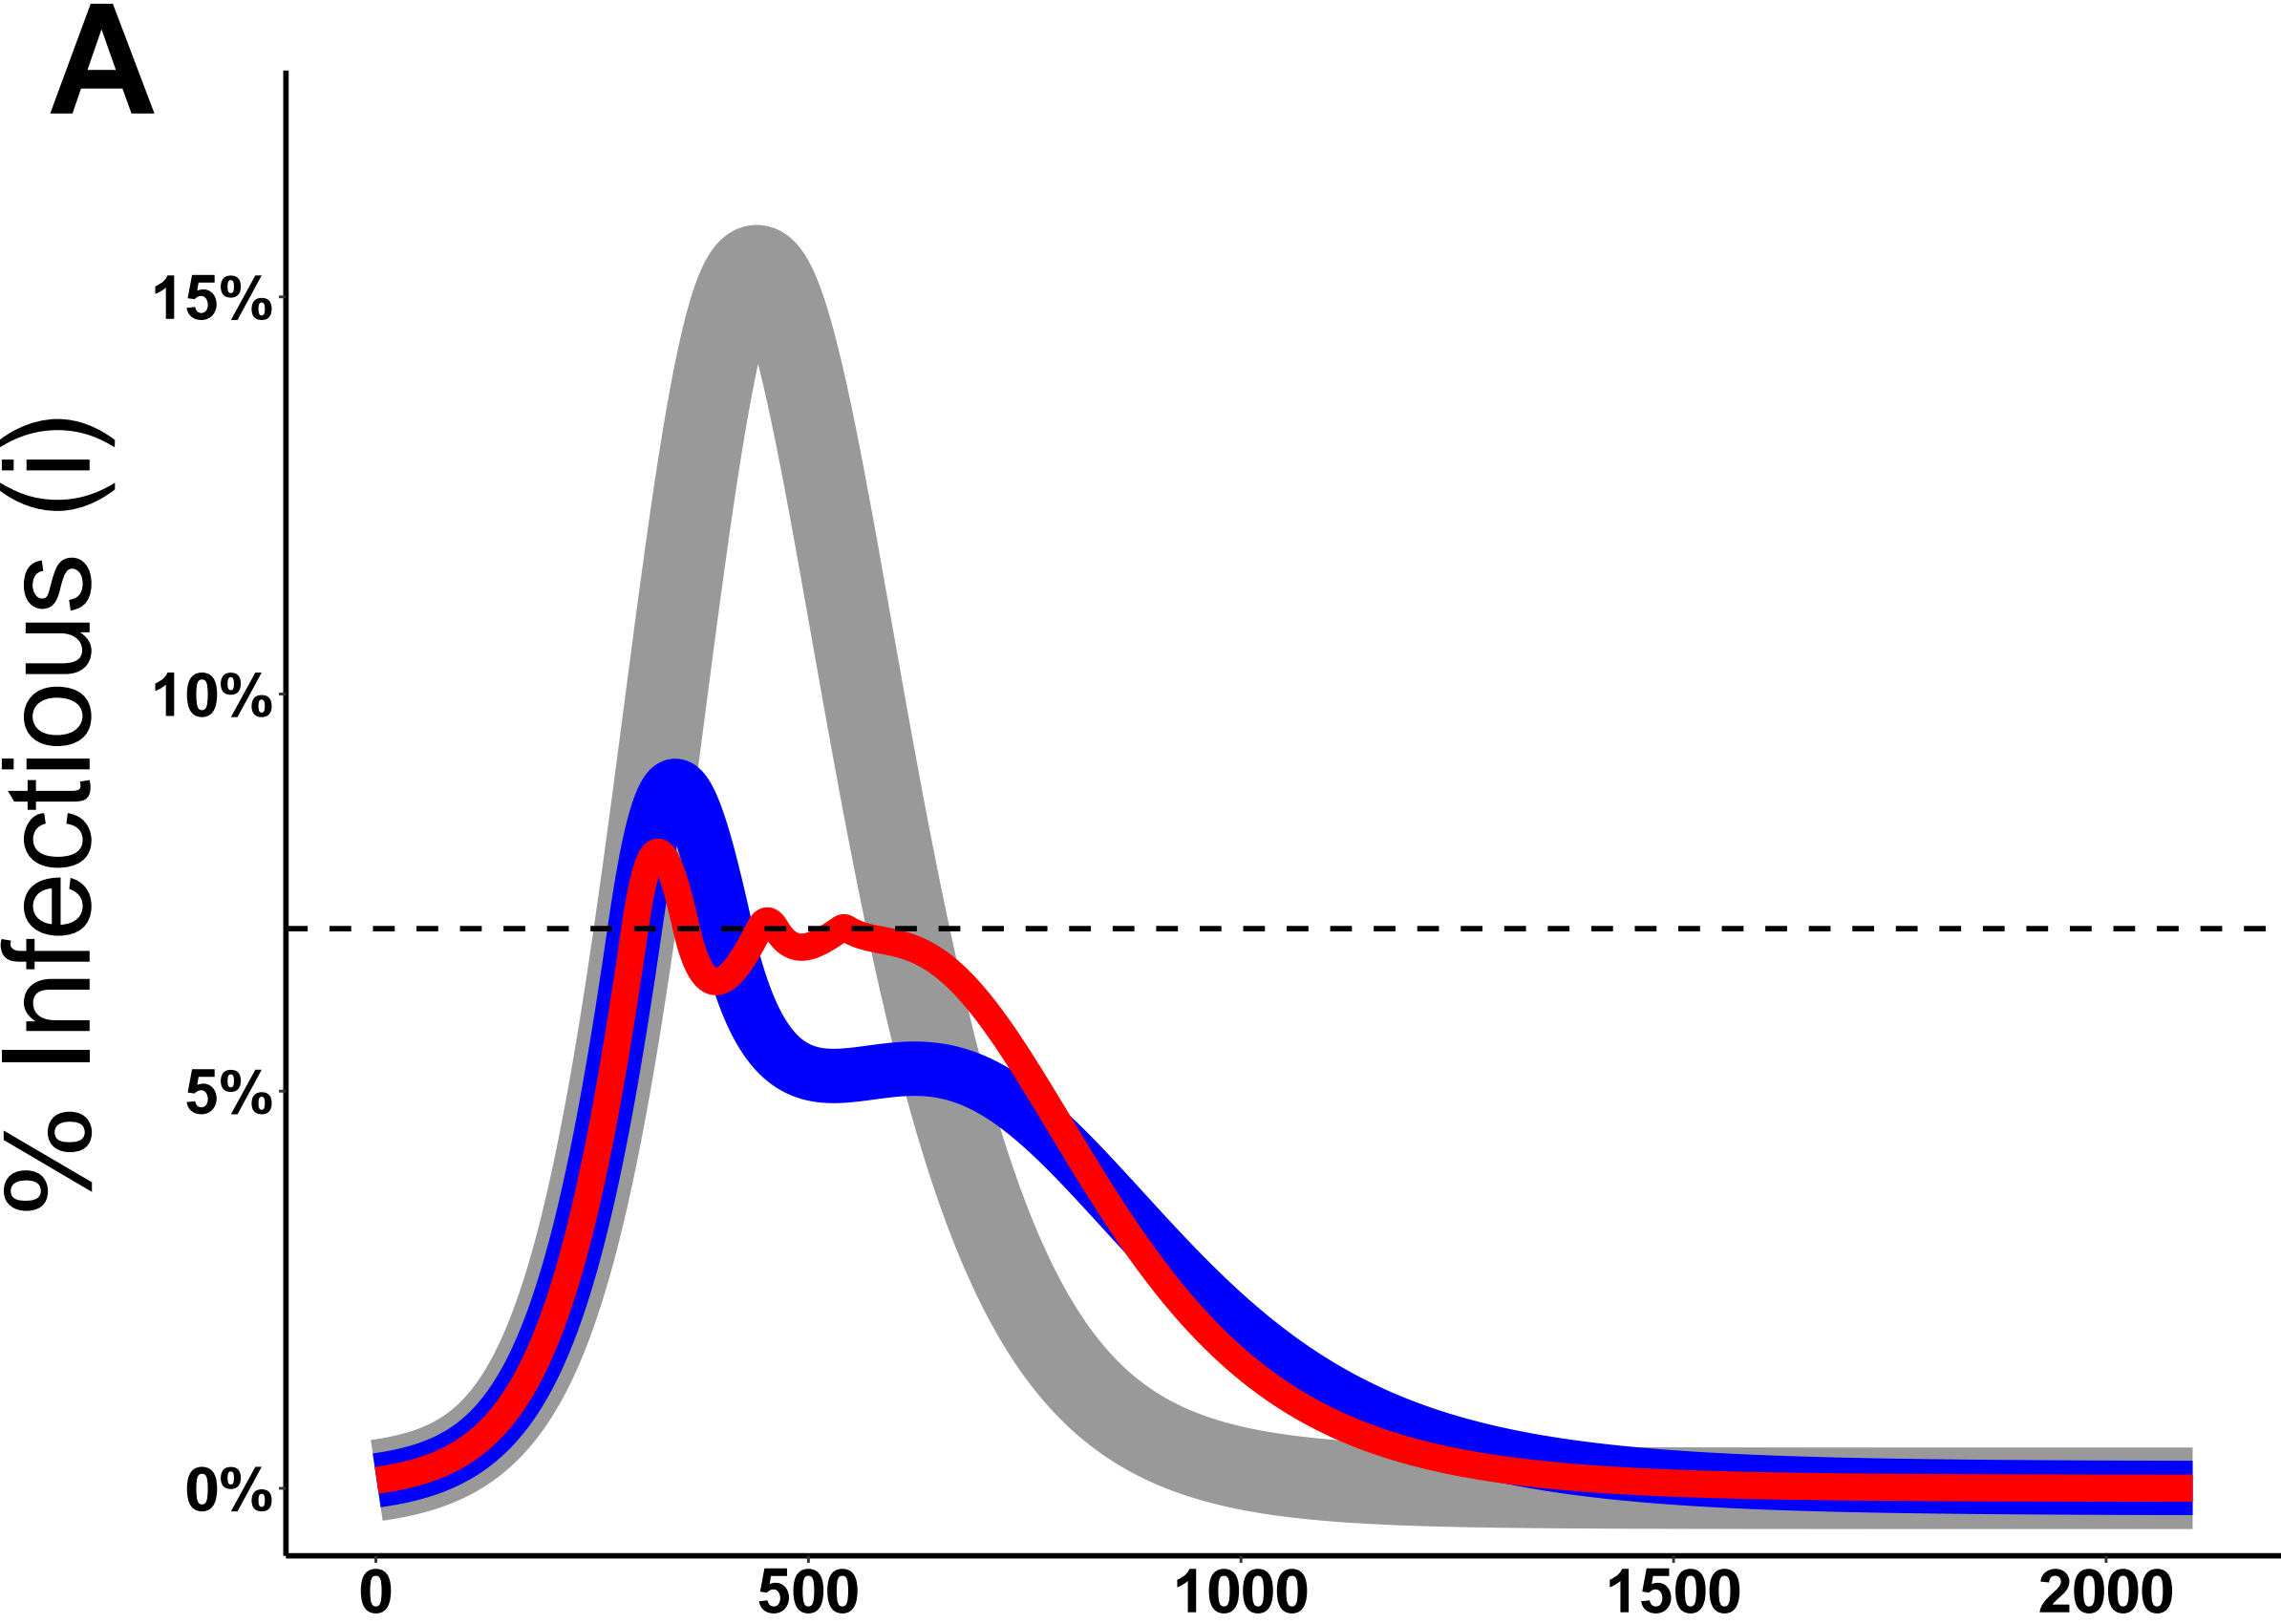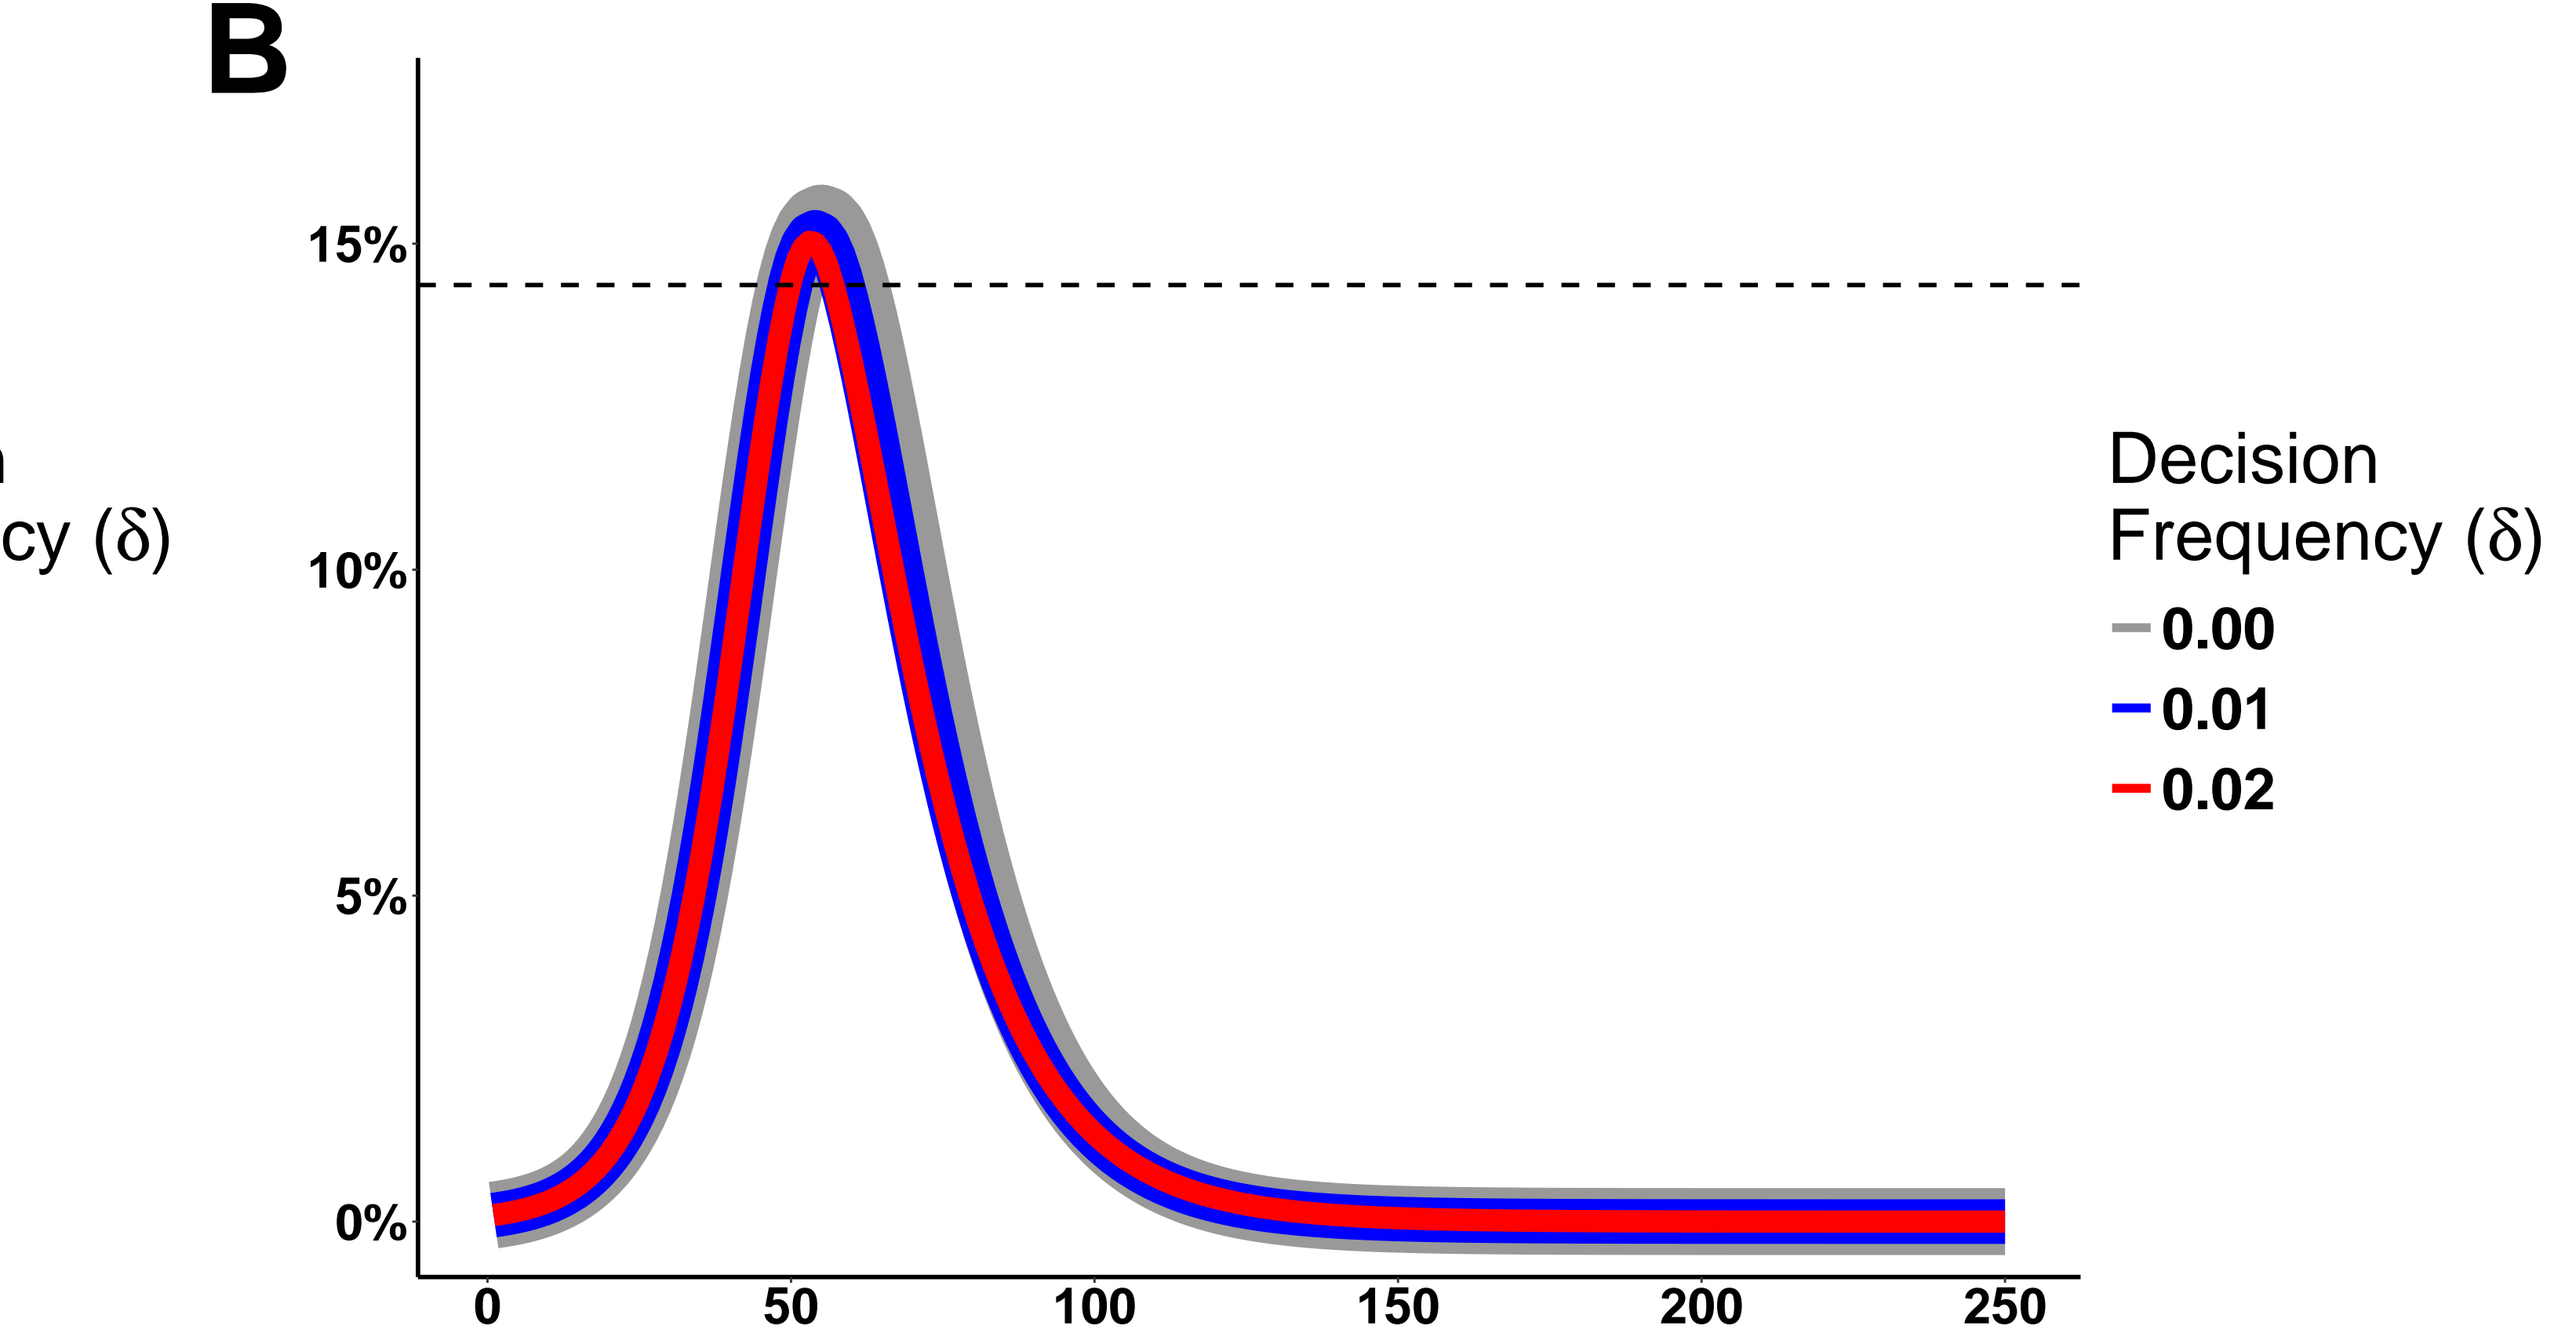

Time (t)

Supplement: supplemental_information.zip [file supplemental_information.zip]
